1 **Expression of retrotransposons contributes to aging in *Drosophila***

2

3 Blair K. Schneider<sup>1</sup>, Shixiang Sun<sup>1</sup>, Moonsook Lee<sup>1</sup>, Wenge Li<sup>2</sup>, Nicholas Skvir<sup>3</sup>, Nicola  
4 Neretti<sup>3</sup>, Jan Vijg<sup>1,4</sup>, and Julie Secombe<sup>1,5,6</sup>

5

6 <sup>1</sup> Department of Genetics, Albert Einstein College of Medicine, Bronx, New York, United  
7 States of America.

8

9 <sup>2</sup> Department of Cell Biology, Albert Einstein College of Medicine, Bronx, New York,  
10 United States of America.

11

12 <sup>3</sup> Department of Molecular biology, Cell biology and Biochemistry, Brown University,  
13 Providence, Rhode Island, United States of America.

14

15 <sup>4</sup> Department of Ophthalmology and Visual Sciences, Albert Einstein College of  
16 Medicine, Bronx, New York, United States of America.

17

18 <sup>5</sup> Dominick P. Purpura Department of Neuroscience, Albert Einstein College of  
19 Medicine, Bronx, New York, United States of America.

20

21 <sup>6</sup> corresponding author: [julie.secombe@einsteinmed.edu](mailto:julie.secombe@einsteinmed.edu) (JS)

22 Running title: Expression of transposons contributes to aging

23 Key words: Lifespan extension, aging, retrotransposon, 412, Roo, Retrofind.

24 **Abstract**

25 Retrotransposons are a class of transposable elements capable of self-replication and  
26 insertion into new genomic locations. Across species, the mobilization of  
27 retrotransposons in somatic cells has been suggested to contribute to the cell and  
28 tissue functional decline that occurs during aging. Retrotransposon expression generally  
29 increases with age, and *de novo* insertions have been observed to occur during  
30 tumorigenesis. However, the extent to which new retrotransposon insertions occur  
31 during normal aging and their effect on cellular and animal function remains  
32 understudied. Here we use a single nucleus whole genome sequencing approach in  
33 *Drosophila* to directly test whether transposon insertions increase with age in somatic  
34 cells. Analyses of nuclei from thoraces and indirect flight muscles using a newly  
35 developed pipeline, Retrofind, revealed no significant increase in the number of  
36 transposon insertions with age. Despite this, reducing the expression of two different  
37 retrotransposons, *412* and *Roo*, extends lifespan, without increasing stress resistance.  
38 This suggests a key role for transposon expression and not insertion in regulating  
39 longevity. Transcriptomic analyses revealed similar changes to gene expression in *412*  
40 and *Roo* knockdown flies and highlighted potential changes to genes involved in  
41 proteolysis and immune function as potential contributors to the observed changes in  
42 longevity. Combined, our data show a clear link between retrotransposon expression  
43 and aging.

44

45 **Author Summary**

46 With the onset of modern medicine, the average age of the population has significantly  
47 increased, leading to more individuals living with chronic health issues. Rather than  
48 treat each age-associated disorder individually, one approach to target multiple health  
49 concerns simultaneously might to be target aging itself. Genomic instability is a hallmark  
50 of aging cells that has been proposed to be a key contributor to age-associated cellular  
51 decline. Transposons are mobile genetic elements capable of inserting into new  
52 genomic locations, thus having the potential to increase genomic instability. Consistent  
53 with this, transposon expression generally increases with age. However, the extent to  
54 which transposon insertions accumulate to disrupt the genome of cells within aging  
55 individuals has remained an open question. We specifically answer this through single  
56 cell whole genome sequencing and find that transposon insertions do not increase with  
57 age. Even though insertions did not increase, the expression of transposons is linked to  
58 aging, as reducing the expression of individual transposons extended lifespan.  
59 Transcriptome studies of these long-lived flies revealed increased expression of genes  
60 linked to proteolysis genes and to functioning of the immune system. Our study  
61 therefore establishes transposon expression, and not insertion, as a critical contributor  
62 to animal aging.

63

## 64 **Introduction**

65 Across species, aging is associated with functional decline and an increased  
66 likelihood of one or more disorders that adversely affect quality of life (1, 2). Driving the  
67 changes that occur at the whole animal level are a range of alterations to cellular  
68 function. One hallmark of aging is genomic instability, in which the accumulation of

69 mutations can alter critical gene expression programs and impact cell division by  
70 promoting tumor formation or by increasing cellular senescence (3, 4). One predicted  
71 genetic contributor to aging is the expression and mobilization of transposable elements  
72 (TEs) in somatic cells. TEs are abundant, comprising ~45-50% of the human, ~37% of  
73 the mouse, and ~20% of the *Drosophila* genomes (5-9). While the specific TEs found in  
74 each animal species are distinct, TEs are a universal feature of eukaryotic genomes  
75 whose expression generally increases with age (10-12). This increased expression  
76 relates to Class 1 transposons, also known as retrotransposons (RTs), that replicate  
77 using an RNA intermediate or a 'copy, paste' mechanism (12). RTs are therefore able to  
78 increase their genomic copy number over time, which gives them a high mutagenic  
79 potential. In contrast, class 2 transposons (DNA transposons) mobilize by excising  
80 themselves in a 'cut, paste' mechanism, so their total number does not increase over  
81 time (12) and less is known about their expression with respect to aging. However, the  
82 precise role that TEs play in driving age-related phenotypes remains an open question.

83

84 The most obvious consequence of TE expression with age is the potential to cause  
85 genomic instability through insertional mutagenesis and/or the creation of  
86 insertions/deletions because of the double-stranded DNA breaks that are needed for TE  
87 reinsertion (12, 13). In addition, cDNA generated as an intermediate during RT  
88 mobilization can activate the immune response and lead to chronic inflammation in  
89 mammals (14-16). Consistent with their potential for interfering with cellular function,  
90 several mechanisms that are conserved across species have evolved to limit the  
91 expression of transposons. For example, many transposons in the genome are

92 contained within constitutive heterochromatin, which is largely transcriptionally silent (3,  
93 9, 17-20). For those elements inserted within euchromatin, RT expression is regulated  
94 post transcriptionally via the siRNA pathway that degrades double-stranded RNA  
95 complexes (21, 22). Further supporting a role for heterochromatin and RNAi in  
96 repressing TE's influence on aging, modulating the activity of either of these pathways  
97 can alter lifespan. For example, reducing the expression of the heterochromatin  
98 component *Lamin B* or components of RNAi-mediated TE silencing machinery  
99 decreases lifespan in *Drosophila* (11, 20). Conversely, increasing expression of the  
100 heterochromatin-promoting histone methyltransferase, *su(var)3-9*, or the activity of the  
101 RNAi pathway increases lifespan (20, 23, 24). It is, however, notable that  
102 heterochromatin and the RNAi pathway are not specific to the repression of TEs, which  
103 complicates the interpretation of the changes to lifespan observed. More direct evidence  
104 supporting a link between TE activation and aging has come from the use of reverse  
105 transcriptase inhibitor drugs that broadly inhibit the ability of RTs to replicate. For  
106 example, *Drosophila* fed nucleoside reverse transcriptase inhibitors (NRTIs) have an  
107 increased lifespan compared to controls (25). This is also observed in mice, where  
108 NRTI treatment attenuates the shortened lifespan caused by loss of *SIRT6*, a known  
109 repressor of *LINE1* (*L1*) elements (14).

110

111 The key to understanding the link between TEs and aging is the extent to which their  
112 expression leads to new insertions. Analyses of the TE, *mdg4* (formerly known as  
113 *Gypsy*), in the adult *Drosophila* brain and fat body using a reporter revealed an increase  
114 in the number of insertions with age (20, 23, 26). However, expanding these findings to

115 endogenous TEs has been challenging, as each somatic cell contains a unique set of  
116 insertions which are difficult to detect using bulk whole genome sequencing  
117 approaches. One approach to address this has been to develop bioinformatic tools to  
118 detect TE insertions more accurately, for example, by using TE junction and target site  
119 duplication data. When applied to bulk whole genome sequencing (WGS), this approach  
120 can detect an age-associated increase in TE insertion number in fly strains with reduced  
121 RNAi pathway activity and in clonally expanded tumors, but not in wild-type animals (24,  
122 27). New insertions can also be accurately identified using long-read sequencing of bulk  
123 DNA as whole elements are detected rather than breakpoints (24, 27). While a small  
124 number of *de novo* insertions were observed using this technique, it was difficult to  
125 determine how frequently TEs mobilized. While technologies to detect new TE  
126 insertions in somatic cells have become more robust using bulk sequencing  
127 approaches, the frequency of new TE insertions within individual somatic cells during  
128 aging remains unknown.

129

130 To understand the extent to which TEs mobilized during aging, we took a single  
131 nucleus whole genome sequencing (WGS) approach using a new pipeline called  
132 Retrofind, that allows us to accurately define the insertional position and load per cell.  
133 Using nuclei isolated from adult thoraces or indirect flight muscles (IFMs), we found that  
134 the number of TE insertions does not increase with age. However, reducing the  
135 expression of two individual TEs, *412* and *Roo*, led to lifespan extension. This suggests  
136 a key role for the expression, and not insertion, of TEs impacting lifespan. This  
137 increased lifespan did not correlate with improved stress resistance or other health

138 improvements traditionally associated with longer life. Transcriptomic studies of long-  
139 lived TE knockdown flies revealed that the expression of genes involved in proteolysis  
140 were upregulated, including the *Jonah* family of genes that encode serine hydrolases.  
141 Additionally, antimicrobial peptides (AMPs), the downstream products of activation of  
142 the *Drosophila* innate immune system that is similar to mammalian inflammation, were  
143 dysregulated in knockdown animals. Overall, our studies show that TE expression and  
144 not insertion likely contributes to aging, potentially through regulation of the *Jonah*  
145 genes and immunity.

146

## 147 **Results**

### 148 **TE insertions do not increase with age**

149 To identify *de novo* TE insertions, we used a single nucleus whole genome  
150 sequencing approach (Fig 1A). Using this methodology, new insertions are represented  
151 in approximately half of the reads in each nucleus, facilitating robust detection. We  
152 carried out our studies using the well characterized  $w^{1118}$  strain that shows a typical  
153 lifespan and is often used as a wild-type control strain (Fig 1A)(24, 28). To distinguish new  
154 insertions that occur with age from preexisting ones within the germline genome, we  
155 defined the TE landscape in the  $w^{1118}$  strain by carrying out bulk sequencing from  
156 pooled young thoraces to a total depth of 157x coverage. Sequencing data was  
157 analyzed using a newly developed in-house TE detection pipeline called RetroFind, in  
158 addition to a published pipeline that has successfully detected somatic insertions in  
159 clonally expanded tumors, so serves as independent validation (27). New TE insertions  
160 were identified by similar criteria for each pipeline by detecting both split and discordant

161 reads of evidence from paired-end sequencing data. Additionally, newly called insertion  
162 sites in the germline genome needed to possess the target site duplication that occurs  
163 because of the double stranded breaks made by the TE-encoded integrase. A total of  
164 871 TE insertions unique to  $w^{1118}$  relative to the *dm6* reference genome were detected  
165 by the two pipelines, with 505 being detected by both (Fig 1B, S1 Table). We consider  
166 these to be high confidence insertions. TE insertions identified in  $w^{1118}$  were primarily  
167 within intronic and intergenic regions and were largely excluded from promoters (+/- 100  
168 base pairs of the transcription start site) and coding sequences (CDS) where they might  
169 disrupt gene function (Fig 1C).

170

171 To determine if the number of TE insertions increased with age in somatic cells, we  
172 isolated and amplified genomic DNA from 21 individual nuclei from thoraces of young (5  
173 days old) and from old (50 days old) flies (Fig 1A). Whole genome sequencing (WGS) of  
174 these 42 nuclei revealed an average 317x coverage of the genome for nuclei from  
175 young thoraces and 354x for nuclei from old thoraces. To confirm our ability to map TEs  
176 in individual nuclei, we looked for the 505 high confidence TE insertions detected from  
177 sequencing bulk genomic DNA. Confirming a robust ability to detect TEs, we find an  
178 average of 90% of high confidence insertions in nuclei from young animals and 94%  
179 from old animals (Fig 1D). While it is notable that more of the known  $w^{1118}$  insertions  
180 were detected in nuclei from old animals, this likely reflects the higher sequencing depth  
181 observed from these samples.

182



183 To identify *de novo* insertions, we used Retrofind and the published pipeline to  
184 analyze the sequencing data for each nucleus, with unique insertions detected by both  
185 pipelines being deemed high confidence (27). This revealed that 57% and 76% of nuclei  
186 from young and old animals, respectively, did not have any new TE insertions (Fig 1E).  
187 A total of 15 new insertions were found across 9 nuclei from young animals and 4 from  
188 old. A maximum of two insertions was detected in any individual nucleus. Each of the 15  
189 *de novo* TE insertions detected was visually confirmed using Integrated Genome Viewer  
190 (IGV), similar to previous studies (27). Like existing TE insertions within the genome,  
191 new insertions occurred primarily in non-coding regions of the genome (Fig 1F). Most of  
192 the new insertions were observed in nuclei from young flies, and all the insertions  
193 observed in old flies, were the *hobo* element (also known as the *H-element*) (S2 Table).  
194 This DNA terminal inverted repeat transposon is an evolutionarily recent addition to the  
195 *Drosophila* genome that is known to be active (29). In addition, the long terminal repeat  
196 (LTR) retrotransposon *HMS-Beagle* and the DNA *S terminal inverted repeat element*  
197 showed a new single insertion in the somatic genome, each in a single nucleus from  
198 young animals. Based on these data, we tested whether the *w<sup>1118</sup>* strain shows  
199 increased TE expression with age. Using qPCR, we find that the expression of a subset  
200 of TEs increases expression with age (Fig 1G). For instance, the TEs *Gypsy12* and  
201 *Copia* that have been previously shown to increase their expression with age in other  
202 tissues such as the fat body (11). The expression of other elements did not change with  
203 age, such as *412* and *Roo*, and some showed decreased expression, such as *297* (Fig  
204 1G). Thus, increased expression of TEs with age does correlate with additional  
205 insertional events.

206

207       Because our single nuclei were isolated from thoraces, they likely represent several  
208 different cell types, possibly obscuring an increase in TEs that might be observed by  
209 analyzing a single tissue. We therefore also purified nuclei from indirect flight muscles  
210 (IFMs), which are a major muscle group in the thorax that show age-associated decline  
211 (30-33). To purify IFM nuclei, they were labeled by a nuclear membrane localized GFP  
212 (UAS-GFP:KASH) using UH3-Gal4 (UH3>GFP:KASH; Fig 2A) (34). Individual GFP  
213 positive nuclei from dissected thoraces were isolated by fluorescence-activated cell  
214 sorting and whole genome amplified in a similar manner to our analyses of thoracic  
215 nuclei. Unamplified, bulk DNA from the abdomen and head regions of the same flies  
216 were sequenced to a total of 443x coverage to exclude strain-specific TE insertions.  
217 Sequencing of the individual nuclei revealed an average of 64x coverage from young  
218 nuclei and 115x from old. Like our findings using nuclei from thoraces, analyses of six  
219 and seven IFM nuclei from young and old flies, respectively, revealed no significant  
220 increase in TE insertions with age (Fig 2B). Approximately half of nuclei examined had  
221 no new insertions and the small number that were observed were inserted into  
222 intergenic or intronic sequences (Fig 2C). These data show that TE insertions do not  
223 increase significantly during aging in cells of the thorax or IFMs.

224

### 225 **Reduced expression of individual retrotransposons extends lifespan**

226       While no increase in TE insertions were observed during adulthood, the expression  
227 of these elements could impact cell function, thereby altering lifespan. For this reason,  
228 we examined the effect of attenuating retrotransposon expression. We chose to focus

229 initially on the retrotransposon *412*, which is part of the *gypsy* super-family of LTR  
230 elements that has been previously shown to be stable in the germline (35). Consistent  
231 with this, we did not observe any new *412* insertions in *w<sup>1118</sup>* compared to the  
232 sequenced strain (S1 Table). Like most RTs, *412* is multi-copy within the genome,  
233 having 36 copies in total, 24 of which are full length (36). We therefore used a  
234 knockdown approach to reduce the expression of *412* to assess the effect on life- and  
235 healthspan. To do this, we generated two UAS-regulated short hairpin transgenes,  
236 *412#1*, and *412#2*, in addition to a control construct expressing a shRNA predicted not  
237 target any mRNAs (control). Driving the expression of UAS-shRNA transgenes targeting  
238 *412* with the ubiquitous Actin5C-Gal4 (Act5C>shRNA) driver led to a ~2-fold reduction  
239 in *412* mRNA levels (Fig 3A). *412* knockdown flies completed metamorphosis normally  
240 and were grossly morphology normal (S1 Fig). Quantifying the lifespan of these animals  
241 revealed significantly extended median and maximum lifespan compared to controls  
242 (Fig 3B-D).

243

244 To confirm the lifespan extension caused by RNAi-mediated knockdown of *412*, we  
245 additionally used CRISPR interference (CRISPRi) to reduce expression of this TE. To  
246 do this, we generated a UAS transgene encoding an enzymatically dead Cas9 protein  
247 fused to the *KRAB* transcriptional repressor (UAS-dCas9:KRAB). dCas9:KRAB was  
248 targeted to the *412* LTR enhancer/promoter region using a transgene expressing a  
249 guide RNA (gRNA) under the control of the ubiquitously expressed, *U6* promoter  
250 (*412gRNA*). As a control, we generated control non-targeted gRNA (control gRNA).  
251 CRISPRi was carried out by crossing Act5C>dCas9:KRAB and *412gRNA* flies, which

252 led to a 1.7-fold reduction in 412 mRNA levels (Fig 3E). In contrast to 412 knockdown  
253 adult flies that were indistinguishable from controls, 412gRNA CRISPRi flies were 7%  
254 heavier than control gRNA flies although they were morphologically normal (S1 Fig).  
255 Mirroring our shRNA results, 412 gRNA-expressing flies showed extended median and  
256 maximum lifespan compared to control gRNA-expressing flies (Fig 3F-H). Reducing the  
257 expression of a single RT is therefore sufficient to extend lifespan.

258

259 To test whether changes in lifespan were specific to 412, we reduced the expression  
260 of another RT that showed 112 new insertions in *w<sup>1118</sup>* compared to the annotated  
261 *Drosophila* genome (S1 Table). Driving the expression of a UAS-shRNA transgene  
262 targeting *Roo* using Act5C-Gal4 led to a ~2-fold reduction in mRNA levels and did not  
263 adversely affect ability of animals to complete metamorphosis or their gross morphology  
264 (Fig 3I; S1 Fig). Quantifying the lifespan of these animals revealed a significantly  
265 extended median and maximum lifespan compared to control animals (Fig 3J-L). The  
266 expression of 412 and *Roo* therefore both contribute to aging.

267

268 **Long-lived 412 or *Roo* knockdown flies do not show improved locomotion or**  
269 **stress resistance.**

270 Extension of longevity can be associated with improved healthspan, which can be  
271 measured as a delay in the onset of age-associated phenotypes. For example, long-  
272 lived fly strains, such as those with reduced insulin signaling, show increased resistance  
273 to starvation and oxidative stress (37). Additionally, progeroid flies have an accelerated  
274 decline in locomotor activity with age (38). We therefore tested the extent to which flies

275 with reduced expression of *412* or *Roo* showed improvements in locomotion and/or  
276 resistance to a range of stress conditions. One classic indicator of age-associated  
277 decline is a reduced locomotion, which can be quantified using a negative geotaxis  
278 assay. This assay takes advantage of an innate response whereby flies move against  
279 gravity by climbing to the top of a vial after being tapped to the bottom (39). Young,  
280 healthy, flies quickly climb to the top third of the vial while fewer older flies climb this  
281 distance. As expected, locomotor ability declined with age across genotypes, with those  
282 in midlife (18 days old) and old age (40 days old) showing an attenuated negative  
283 geotaxis response than young flies (5 days old) (S2 Fig). Midlife flies also have more  
284 locomotion when compared to old age flies (S2 Fig). At all ages tested, *412* knockdown  
285 flies displayed locomotor capacity that was either indistinguishable or worse (*412#1*)  
286 than control animals (*412#2*) (Fig 4A and S2 Fig). Similarly, the locomotor capacity of  
287 *Roo* knockdown animals was not different than control animals (Fig 4A).

288

289 To assess whether reduced RT expression altered resistance to oxidative stress, we  
290 treated ubiquitous *412* or *Roo* knock down flies with paraquat and quantified survival  
291 compared to control flies. This revealed that the two *412* shRNA transgenes behaved  
292 differently from each other, with *412#2* showing no change to survival and *412#1* having  
293 slightly reduced resistance to oxidative stress (Fig 4B). *Roo* knockdown animals  
294 showed no change resistance to oxidative stress compared to control animals (Fig 4B).  
295 We additionally tested survival in response to endoplasmic reticulum (ER) stress  
296 through treatment with the antibiotic tunicamycin (40), starvation, and thermal stress  
297 (cold and heat). None of these treatments led to a consistent change in survival for *412*

298 or *Roo* knockdown flies except starvation, where both *412* knockdowns showed  
299 increased sensitivity (Fig4C-F). An additional corollary to increased lifespan is a decline  
300 in fertility (41). We therefore quantified fecundity of *412* and *Roo* knockdown flies by  
301 counting the number of eggs laid per day and found no significant difference (Fig 4G).  
302 Nor was the fertility of *412* or *Roo* knockdown animals altered, as the number of adult  
303 flies produced from those eggs was indistinguishable from controls (Fig 4H). Combined,  
304 these assays show that reducing *412* or *Roo* expression does not improve standard  
305 assays of health and/or stress resistance that might be expected in these long-lived  
306 flies.

307

### 308 **TE knockdown affects genes linked to proteolysis and immunity**

309 To gain insight into the cellular changes caused by reduced TE expression, we  
310 performed RNA-seq on thoraces of Act>shRNA animals at mid-life (day 20). We chose  
311 mid-life as others have seen changes to age-associated phenotypes at this time point  
312 (20, 38). 332 differentially expressed genes (DEGs) were identified in *412* knockdown  
313 animals compared to control shRNA expressing flies using a 5% false discovery rate  
314 (FDR) cutoff. 212 of these genes were upregulated while 120 were downregulated and  
315 averaged a log<sub>2</sub> fold change of 2.5 and 1.5, respectively (Fig 5A; S3 Table). Functional  
316 analyses of upregulated genes using GO DAVID revealed significant enrichment in the  
317 single gene ontology (GO) category of proteolysis using a 1% FDR (42, 43). Many of  
318 these genes were members of the Jonah (Jon) family of serine proteases, including  
319 *Jonah 25Bi-iii*, *Jonah 44E*, *Jonah 65Aiii*, *Jonah 65Aiv*, *Jonah 74E*, and *Jonah 99Ci-iii*

320 (S5 Table) (42, 43). Similar GO analyses of downregulated genes did not reveal any  
321 significantly enriched categories using an FDR of 1%.

322

323 To determine the extent to which knockdown of *Roo* led to similar changes to gene  
324 expression as *412*, we carried out RNA-seq analyses using thoraces of ubiquitous *Roo*  
325 knockdown flies. 344 genes were found to be differentially expressed in *Roo* knockdown  
326 animals, 236 of which were upregulated average and 108 were down compared to  
327 control animals (5% FDR; Fig 5B; S4 Table). As with knockdown of *412*, the changes to  
328 gene expression in response to reduced *Roo* expression were relatively small,  
329 averaging 1.1 and 1.3 log<sub>2</sub> fold change for up- and downregulated genes, respectively.  
330 Interestingly, upregulated genes were enriched for the same proteolysis GO term as  
331 was observed in *412* knockdown animals (42, 43) (1% FDR cutoff; S6 Table). No GO  
332 terms were significantly enriched among the downregulated genes.

333

334 Based on the identification of the same GO term in *412* and *Roo* knockdown  
335 datasets, we compared the transcriptional changes of these two strains. This revealed  
336 97 genes common to both datasets, a majority of which behaved similarly ( $r=0.9461$ ;  
337  $p<0.0001$ ; Fig 5C). These genes were enriched for the single GO term of proteolysis  
338 (42, 43) (1% FDR cutoff; S7 Table). To understand the relationship between genes  
339 observed to be dysregulated within the proteolysis GO category, we used STRING,  
340 which revealed a distinct interaction node mainly based on co-expression and co-  
341 occurrence (Fig 5D) (44). The *Jon* genes, a family of serine proteases, were at the  
342 center of this node (45). Two thirds of the genes affected by *412* and *Roo* knockdown

343 were upregulated in knockdown flies, including all of the genes within the proteolysis  
344 category (Fig 5E). While little is known about the Jonah proteins, their expression  
345 appears to be primarily in the gut, where they are assumed to aid in digestion (45).  
346 However, expression of the *Jon* genes has also been linked with changes to the  
347 immune deficient (IMD) and Toll immunity pathways, which have previously been  
348 associated with lifespan regulation (46-48). Consistent with this, the expression of  
349 antimicrobial peptides (AMPs) that are downstream of the IMD and Toll pathways are  
350 affected in *412* or *Roo* knockdown flies, with several *Drosomycins* (e.g., *Drsl2*, *Drsl3*,  
351 *Drsl5*) significantly downregulated and *Attacin-A* (*AttA*) being significantly upregulated  
352 (Fig 5F). Overall, our data suggest that TEs such as *412* and *Roo* alter the expression  
353 of genes related to proteolysis regulation and the immune system to influence longevity.

354

## 355 **Discussion**

356 In this study we find that there is no significant increase in TE mobilization with  
357 age in *Drosophila*, indicating that they have a robust mechanism for preventing *de novo*  
358 TE insertions in somatic cells. Based on the observation that reduced activity of the  
359 RNAi pathway leads to an increase in TE insertions with age, this mechanism is likely a  
360 key means of limiting *de novo* TE insertions during normal aging (24). By combining a  
361 single nucleus whole genome sequencing approach with analyses using two pipelines,  
362 we are confident that new insertions would have been detected if present. Prior to our  
363 study, the most compelling data indicating increased TE insertions with age in wild-type  
364 animals came from use of a TE reporter transgene and sequencing of bulk DNA  
365 samples (24, 27, 49). Use of a fluorescent reporter for the RT *mdg4* revealed age-



366 associated *de novo* insertions in cells of the adult brain and fat body, although the  
367 frequency was low (23, 26). In addition, examining the insertional proficiency of all TEs  
368 through long-read sequencing of pooled adult brains or midguts showed new insertions  
369 by several different elements, including *mdg4* and *Roo* (27). Like the *mdg4* reporter  
370 data, the number of new insertions detected using this approach was low, averaging  
371 less than one new integration event per individual (27). Because both approaches  
372 identified new insertions, it is possible that TEs are more highly expressed in the gut  
373 and brain than cells of the thorax, allowing some insertions to occur during aging in  
374 these tissues. Alternatively, given the low frequency of new TE insertions that were  
375 observed, it is more likely that these published data are congruent with our study. Based  
376 on the rate of transposition observed, our sequencing analyses of 42 thoracic nuclei (21  
377 from young flies and 21 from old) was unlikely to be sufficient to detect new insertions.  
378 Consistent with our data that endogenous expression of TEs does not necessary lead to  
379 new insertions, overexpression of *mdg4* does not increase the number of genomic  
380 copies of this element (50). We therefore suggest that new TE insertions are unlikely to  
381 be a key driver of cell and tissue dysfunction that occurs during normal aging.  
382 Interestingly, this contrasts with disorders such as cancer where there is clear evidence  
383 from mammalian cells and flies that TE insertions are a frequent occurrence that likely  
384 impact disease severity (27, 51-53).

385

386 Previous functional evidence supporting TE mobilization playing a role in aging  
387 has come from the pharmaceutical approach of using RT inhibitors, with  
388 phosphonoformic acid (PFA) or dideoxyinosine (ddI) and Lamivudine (3TC) or

389 Stavudine (d4T) treatment extending lifespan in *Drosophila* and mice, respectively (14,  
390 25). NRTIs are well-established to block retrotransposon replication thereby preventing  
391 RT reinsertion (14). However, RT inhibitor treatment can additionally decrease RNA  
392 levels of the *L1* element in human cells, thus the effect of these drugs may not be  
393 limited to restricting mobilization (49). If NTRIs exert similar effects in flies, the extended  
394 lifespan seen using these drugs could be due to reduced expression of some or all TEs,  
395 rather than changes to replicative capacity. These data, like ours showing that TE  
396 knockdown affects lifespan without increasing mobilization, suggest that the presence of  
397 TE mRNA may be generally detrimental to cell and animal function.

398

399       Because of their similarity to retroviruses, cytosolic DNA intermediates produced  
400 by RTs can trigger the activity of the immune system (14-16, 54). In human cells, *L1*  
401 retrotransposon expression induces the interferon beta (*IFN* $\beta$ ) inflammatory response  
402 (15, 16). This can lead to chronic inflammation (inflammaging), which is common in  
403 aged individuals and is associated with cellular senescence (16). In mammals,  
404 recognition of cytosolic RT DNA by *cGAS/STING* triggers the *NF* $\kappa$ *B* pathway and the  
405 *IFN* $\beta$  inflammatory response (14, 54). *Drosophila* does not have adaptive immunity, but  
406 many proteins that comprise the innate immune response are homologous to those that  
407 regulate the mammalian inflammatory response (54). In *Drosophila*, *STING* activates  
408 the *NF* $\kappa$ *B* homolog *Relish* to activate the immune defective (IMD) pathway and the  
409 expression of AMPs (54). This functions in parallel to the Toll pathway that acts through  
410 *Dorsal-related immunity factor (Dif)*, another *NF* $\kappa$ *B* homolog, to activate the production  
411 of AMPs (55-57). We did not find the expression of components of the upstream

412 components of the IMD and Toll pathways to be altered in *412* or *Roo* knockdown  
413 animals. However, several *Drosomycin* genes that encode AMPs downstream of the  
414 Toll pathway activation were downregulated upon TE knockdown. Lowering the  
415 expression of AMPs extends lifespan (58), suggesting that this may contribute to the  
416 lifespan changes seen in TE knockdown flies. While the mechanism by which *412* or  
417 *Roo* knockdown alters the expression of AMP genes remains to be determined, it may  
418 be linked to the upregulation of genes involved in proteolysis. In particular, genes of the  
419 *Jonah* serine hydrolase family are activated upon RNA viral infection and can influence  
420 the expression of *Drosomycins*, although the mechanism for this is unknown (47, 48).  
421 Jon proteins have a conserved function as their mammalian homolog, *Chymotrypsin like*  
422 (*CTRL*), is also involved in proteolysis within the gut (45, 59-62). Recently, a  
423 chymotrypsin/trypsin fusion protease has been utilized as a treatment for inflammation  
424 and to promote wound healing (63), suggesting a conserved link between these serine  
425 proteases and inflammation. We therefore hypothesize that the upregulation of the  
426 *Jonah* genes could dampen the immune system, and this could contribute to the  
427 extension of lifespan seen in animals with reduced expression of TEs.

428

429         Increased lifespan often coincides with improved stress resistance or other  
430 markers of health as illustrated by the insulin mutant and progeroid flies showing  
431 changes to oxidative stress and starvation and locomotion, respectively (37, 38). In  
432 contrast, knockdown of *412* or *Roo* increased lifespan without promoting observable  
433 stress resistance or delaying the onset of age-associated changes such as decreased  
434 mobility. Previous studies in *Drosophila* examining changes to heterochromatic and

435 RNAi pathways to modulate TE activity did not examine these classic stress assays (11,  
436 23). Thus, it is possible that TE expression-induced changes to lifespan occur without  
437 altering stress resistance, effectively uncoupling life- and healthspan. Defining the  
438 precise links between *412*, *Roo* and other TEs and their effect on cellular and organism  
439 function during aging will require additional genetic and molecular studies to elucidate  
440 the links between the *Jonah* genes, immunity, and aging.

441

## 442 **Materials and methods**

### 443 **Fly strains**

444 The following fly stocks were obtained from Bloomington Drosophila Stock Center:  
445 Act5C-Gal4 (BL #3954), *w<sup>1118</sup>* (BL#5905), UAS-dcas9-VPR (BL#67062). UH3-Gal4 was  
446 a gift from the Sparrow lab (Singh et al., 2014). UAS-shRNAs were generated according  
447 to the TRiP protocol using the pVALIUM20 vector (Addgene) (64). shRNA primers are  
448 listed in the primers table and were designed using the Designer of Small Interfering  
449 RNA webtool (65). UAS-shRNAs were inserted into the attP site at 86F (BL #24749) by  
450 BestGene. gRNA flies for CRISPRi were generated using the protocol from CRIPR fly  
451 design (66-72). The pCFD3 vector (Addgene) was used to insert a gRNA downstream  
452 of the U6:3 promoter, allowing for ubiquitous expression of the gRNA. gRNA transgenes  
453 were inserted into the attP site at 86F (BL #24749) by BestGene. UAS-dcas9:KRAB  
454 flies were created by In-Fusion® cloning system (Takara) using the pUAST-attB from  
455 the Drosophila Genomics Resource Center (# 1419) and dCas9-KRAB (Addgene  
456 SID4X-dCas9-KRAB; #106399). The primers are listed in the S8 Table and the PCR  
457 amplifications were performed using the CloneAmp™ HiFi PCR Premix (Takara). The

458 pUAST-dCas9-KRAB plasmid was recombined into the attP site attP40 (BL #24749) by  
459 BestGene.

460

#### 461 **Fly care**

462 Fly food contained 80g malt extract, 65g cornmeal, 22g molasses, 18g yeast, 9g agar,  
463 2.3g methyl para-benzoic acid and 6.35ml propionic acid per liter. Flies were kept at  
464 25°C with a 12-hour light/dark cycle and 50% humidity. Day of eclosion is defined as day  
465 zero in all analyses. Adults were collected 2 days after the first flies eclosed, allowed to  
466 mate for a day, sorted by sex and allowed to age to the specified time point. Flies were  
467 kept at a density of 25 or less per vial. Flies were transferred to a new vial of food twice  
468 a week until they reached the desired age for the experiment. All of these studies used  
469 female flies.

470

#### 471 **RNA-seq**

472 Triplicate samples of 20 thoraces from adults were collected at day 20 from  
473 Act5C>shRNA (Control, 412#1, and Roo) and frozen at -80°C. RNA was extracted using  
474 TRIzol (Invitrogen) and sent to Novogene for quality assessment, library preparation,  
475 sequencing, and differential expression analysis. Sequencing was performed on using  
476 an Illumina platform with a sequencing by synthesis (SBS) method. HISAT2 was used  
477 to map the reads to the *Drosophila* genome (*dm6*), Novogene calculated the read  
478 counts and FPKM (fragments per kilobase of transcript per million base pairs  
479 sequenced) values and then used DESeq2 was used to perform differential expression  
480 analysis (73). DAVID was used to obtain gene ontology (GO) terms (42, 43). String was

481 used to observe protein interactions of the enriched gene products (44). The data  
482 discussed in this publication have been deposited in NCBI's Gene Expression Omnibus  
483 (74) and are accessible through GEO Series accession number GSE207160.

484

#### 485 **qPCR**

486 TRIzol was used to extract total RNA from 5 whole adult flies quantification of  
487 knockdown efficiency and heads and thoraces for examining expression of TEs in  
488 young and old *w<sup>1118</sup>*. RNA was DNase treated (Invitrogen) and cDNA was synthesized  
489 using the Verso cDNA kit (Thermo-Fisher AB1453A). 1-5µg of RNA was used for cDNA  
490 creation. PowerUp SYBR Green Master Mix was used to perform qPCR on the Applied  
491 Biosystems QuantStudio3 system. *rp49* (*RpL32*) was used as the housekeeping gene  
492 to normalize relative gene expression changes. Experiments were performed in 3-5  
493 biological replicates. An unpaired t-test with Bonferroni correction was used as the  
494 statistical test. Primers used in these experiments can be found in the S9 Table. (11,  
495 75-82)

496

#### 497 **Lifespan quantification**

498 Adult flies were collected 48 hours after eclosion and mated for 24 hours. Flies were  
499 sorted by sex and genotype and placed at a density of no more than 25 flies per vial.  
500 The number of dead animals was counted twice a week and remaining live flies were  
501 transferred to new food vials. Lifespan experiments were performed in triplicate  
502 (separate crosses) and results pooled. A Dunnett test was used to compare survival  
503 curves. A Gehan-Breslow-Wilcoxon test was used to compare median lifespan.

504 Difference in maximum lifespan was calculated by a permutation test (95th percentile)  
505 followed by two-sided t-test with correction for multiple comparisons.

506

#### 507 **Oxidative stress survival**

508 Flies were placed on 20mM paraquat (Sigma), 1% agar, 5% sucrose media at day 40  
509 post eclosion. The number of dead animals were counted every 4-8 hours until all flies  
510 were dead. The experiment was performed in biological triplicate. A Dunnett test was  
511 used to compare survival curves.

512

#### 513 **Starvation survival**

514 Day 40 adult flies were provided with Whatman paper-soaked in water and the number  
515 of dead animals counted every 4 hours until all flies were dead. The experiment was  
516 performed in biological triplicate. A Dunnett test was used to compare survival curves.

517

#### 518 **Endoplasmic reticulum stress survival**

519 Flies were placed on 12  $\mu$ M tunicamycin (Sigma), 1.5% agar, and 5% sucrose media at  
520 day 20 post eclosion. The number of dead animals were counted every day until all flies  
521 were dead. The experiment was performed in biological triplicate. A Dunnett test was  
522 used to compare survival curves.

523

#### 524 **Negative geotaxis**

525 Flies at days 5, 20, and 40 post eclosion were recorded while they were tapped down to  
526 the bottom of empty vials. After 10 seconds the number of flies in each third of each vial

527 were counted. Flies were allowed a minute to recover before the experiment was  
528 repeated. The experiment was performed a total of three times in biological triplicate. A  
529 Chi-square test for trend was used to compare the locomotor activity of the different  
530 genotypes.

531

### 532 **Fecundity and Fertility**

533 Females were mated with *w<sup>1118</sup>* males (1:1 ratio) at day 25 post eclosion at a density of  
534 approximately 20 flies per vial. Females were given 24 hours to lay eggs, then  
535 transferred to a new vial and the eggs per vial were counted every day for 5 days.  
536 Fecundity was calculated as the average number of eggs laid per vial per day. To  
537 assess fertility, the number of eggs laid was quantified and animals allowed to develop  
538 until eclosion at which point the number of adults flies were quantified. The fertility index  
539 was calculated by dividing the number of adult flies by the number of eggs laid per vial.  
540 A fertility index of 1 is defined as 100% fertile. A One-way ANOVA was used to  
541 calculate the differences in fecundity and fertility across genotypes.

542

### 543 **Thermal stress survival**

544 To test sensitivity to cold stress, flies were placed in new food vials and placed at 4°C on  
545 ice for 15 hours at day 20 post eclosion. Flies were given 48 hours to recover at 25°C  
546 and the number dead flies counted. To test heat sensitivity, flies were placed in new  
547 food vials and placed at 37°C until about 80% of flies were immobile at the bottom of the  
548 vial with heat paralysis. Flies were given 48 hours to recover at 25°C and the number of



549 dead flies were counted. Assays were performed in biological triplicate. A Fisher's exact  
550 test was used to calculate the difference in survival across genotypes.

551

### 552 **Body weight and animal size**

553 Zeiss Discovery.V12 SteREO with the AxioVision Release 4.8 software was used to  
554 capture pictures of adult flies using a ruler to show size. All images were processed  
555 using Adobe Photoshop. Flies were 2 days post eclosion for imaging and body mass  
556 quantification. To measure body mass, 10 flies of each genotype were placed in 1.5mL  
557 Eppendorf tube and weighed. This was done in biological triplicate. A One-way ANOVA  
558 was used to calculate body weight differences across genotypes.

559

### 560 **Purification and amplification of individual thoracic nuclei**

561 40-60 thoraces from young (5 days old) or old (50 days old) *w<sup>1118</sup>* flies were dissected  
562 and single nuclei were prepared according to (83) with minor alterations. Briefly, instead  
563 of using a Polytron, thoraces were homogenized with an automatic pestle for 5 minutes  
564 on ice, transferred to a 7mL Dounce homogenizer and pulverized with 30 stokes of the  
565 pestle. Debris was filtered using a 20-micron filter and subsequently with a 10-micron  
566 filter (twice). Nuclei were then sorted into individual tubes using the CellRaft AIR®  
567 System. Genomic DNA from each nucleus was amplified by multiple displacement  
568 amplification and made into libraries according to (84). Libraries (21 per group) were  
569 subjected to paired end whole genome sequencing (WGS) on the Illumina 2500  
570 platform at Novogene. The data discussed in this publication have been deposited in

571 NCBI's Sequence Read Archive and are accessible through BioProject accession  
572 number: PRJNA854389.

573

#### 574 **Purification and genome amplification of IFM nuclei**

575 UH3-Gal4/ +; +/+; UAS-Klar-KASH/+ flies were aged to either 5 (young) or 60 (old)  
576 days. 50 thoraces per group were dissected and single nuclei were prepared using the  
577 nuclei EZ isolation kit (Sigma) according to manufacturer instructions. Nuclei were then  
578 stained with DAPI, and fluorescence-activated cell sorting (FACS) sorted gaiting for  
579 DAPI (4',6-diamidino-2-phenylindole) and GFP positive populations using the  
580 MoFloXDP at the Flow Cytometry Core Facility at Albert Einstein College of Medicine.  
581 The first gate selected for size by plotting forward scatter (FSC, size) against side  
582 scatter (SSC, granularity), with debris being outside the gate. 99.6% of the population  
583 was not debris. A log scale was used to visualize high signals from both axes in the  
584 same plot. The second gate selected for single nuclei by plotting SSC-width (doublets)  
585 against SSC-height (intensity). Single nuclei were 30.14% of the population. The last  
586 and final gate selected for intact IFM nuclei by plotting GFP (IFM) against DAPI (DNA).  
587 The nuclei were sorted into individual tubes and subject to single nucleus whole  
588 genome amplification (snWGA) using the REPLI-g® UltraFast Mini kit (Qiagen). The  
589 snWGA was performed by a multiple displacement amplification as in this previous  
590 publication (85). The snWGA amplicons were purified using AMPure XP magnetic  
591 beads (Agencourt). The snWGA amplicons were then subject to a locus drop out (LDO)  
592 test to screen for amplification of five regions dispersed throughout the genome, similar  
593 to previous studies (86). The Fast SYBR® Green Master Mix (Applied Biosystems) was

594 used for the qPCR reaction. Nuclei with the most primer sets passing the LDO test were  
595 subjected to paired end sequencing (scWGS) on the Illumina 2500 platform at  
596 Novogene. Bulk/pooled unamplified genomic DNA from young abdominal segments  
597 was used as the control for genomic insertions already present in the strain. The data  
598 discussed in this publication have been deposited in NCBI's Sequence Read Archive  
599 and are accessible through BioProject accession number: PRJNA854818.

600

### 601 **Bioinformatic analyses of single nucleus data**

602 To control for genetic background germline TE insertions, genomic DNA was extracted  
603 from pooled young (day 5) thoraces from 50 flies and sequenced at Novogene. Fastq  
604 files were analyzed using the new pipeline Retrofind and also the published pipeline  
605 from the Bardin lab (27). Retrofind pre-filters input sequencing reads to require at least  
606 one mate pair to contain retrotransposon DNA sequences. Next, Retrofind conducts an  
607 alignment on the pre-filtered reads using the BWA mem aligner under strict conditions  
608 (87). Samtools coordinate sorts and Picard tools removes duplicates from the alignment  
609 (88). Reads inconsistent with a proper mate pairing or with larger than expected insert  
610 size are identified as a discordant read pair. Split reads are identified from reads  
611 aligning with soft or hard clipping above a threshold. Candidate split and discordant  
612 reads are aligned using BWA mem to a list of consensus sequences derived from  
613 Repbase (89). Candidate reads are then grouped into clusters using bedtools and  
614 designated as 5' (left) and 3' (right) junction reads (90). Next, a heuristic process is  
615 applied to the left and right junction to identify a retrotransposition that satisfies filtering  
616 options. If there is at least one right junction and one left junction split read, a target site

617 duplication (TSD) prediction is made. There is an option to require a TSD prediction  
618 within a user-defined range. The default TSD size range we consider is 2-30 base pairs.  
619 The exported file includes an identification number that can be used to link reads of  
620 support to the transposition call. Lastly, Retrofind also outputs *de novo* assembly of  
621 supporting reads using the Megahit short read assembler (91) and a BWA mem  
622 alignment of assembled contigs to the genome. The reads of support and assembled  
623 contig alignment can be visually inspected using a genome browser. Retrofind was  
624 validated using the pipeline and methods described in (27).

625 *De novo* TE insertions detected in both young and old IFM nuclei compared to  
626 the bulk genomic DNA to exclude the insertions that are present within the germline.  
627 The genomic location of insertions identified in *w*<sup>1118</sup> were determined using  
628 ChIPSeeker (92). High quality insertions were defined as insertions detected within both  
629 pipelines and validated in IGV.

630

### 631 **Data Accessibility**

632 RNA-seq data can be accessed through GEO Series accession number GSE207160.  
633 The thoracic WGS data can be accessed through the Sequence Read Archive (SRA)  
634 and are accessible through BioProject accession number: PRJNA854389. The indirect  
635 flight muscle WGS data can be accessed through the SRA BioProject accession  
636 number: PRJNA854818.

637

### 638 **Acknowledgements**

639 We thank members of the Secombe, Vijg, and Baker labs for their insights throughout  
640 this project, particularly Shannon Lightcap who generated several transgenes used in  
641 this study, and Matanel Yheskel who helped with bioinformatic analyses. We are also  
642 very grateful to Alison Bardin and lab members for assistance with their TE insertion  
643 pipeline and Masako Suzuki, Jack Lenz and Kenny Ye for their genomics and genetics  
644 expertise. We are grateful for fly strains from the Bloomington *Drosophila* Stock Center  
645 (NIH P400D018537). This work was supported by NIH R01 AG053269 to J.S.,  
646 T32AG023475 and T32GM007491 to B.K.S, the shared instrument grant  
647 1S10OD023591-01, and the Einstein Cancer Center Support Grant P30 CA013330.  
648

#### 649 **Supporting information captions**

#### 650 **Fig 1. Single cell whole genome sequencing of young (day 5) and old (day 50)**

#### 651 ***Drosophila thoraces***

652 (A) A schematic of the workflow of the isolation of single nuclei and how new TE  
653 insertions were detected. The typical  $w^{1118}$  wild type strain lifespan is also displayed.

654 (B) The number of new TE insertions in the  $w^{1118}$  strain from the bulk WGS in  
655 comparison to the sequenced reference strain (dm6) using both the pipeline from  
656 Siudeja et al (27) and Retrofind. 505 insertions were called by both pipelines. (C) The  
657 distribution of the genomic locations where the  $w^{1118}$  strain TE insertions fall. (D) The  
658 number of known TE insertions (strain/background insertions) that were able to be  
659 detected within each nuclear sample represented as a percentage of the insertions  
660 detected in the sample out of total strain insertions. Each dot represents a nucleus. (E)  
661 The number of new TE insertions within each nucleus that are not previously called

662 within the strain or other nuclei. Each dot represents a nucleus. Unpaired t-test. ns p=  
663 0.1809. (F) The distribution of genomic locations where the 15 new TE insertions within  
664 individual nuclei fall. (G) qPCR using SYBR green showing levels of TE mRNA relative  
665 to Rp49 (Rpl32) from adult *w<sup>1118</sup>* flies young (day 5) in blue and old (day 50) in red head  
666 and thoraces. The experiment was performed in three biological replicates. An unpaired  
667 t-test with Bonferroni correction was used. \*\*\* (*Accord*) p= 0.0009 \*\* (*Blastopia*) p=  
668 0.0020. \* (*Blood*) p= 0.0262. \*\*\* (*Copia*) p= 0.0007. \* (*gypsy12*) p= 0.0171. \*\* (*HMS-*  
669 *Beagle*) p= 0.0011. \*\* (*Tahre*) p= 0.0038. \*\* (*Springer*) p= 0.0026. ns (*412*) p= 0.1453.  
670 ns (*Bari2*) p=0.7403. ns (*DM1731*) p= 0.0702. ns (*McClintock*) p= 0.1814. ns (*Roo*) p=  
671 0.7985. ns (*Stalker4*) p= 0.7957. \*\* (*297*) p= 0.0012. \*\*\* (*Tabor*) p= 0.0005.

672

## 673 **Fig 2. Single cell whole genome sequencing of young (day 5) and old (day 60)**

### 674 ***Drosophila* indirect flight muscles**

675 (A) A schematic of the workflow of the isolation of single nuclei and how new TE  
676 insertions were detected from indirect flight muscles (IFMs). (B) The number of new TE  
677 insertions within each nucleus that are not previously called within the strain or other  
678 nuclei. Each dot represents a nucleus. Unpaired t-test. ns p >0.9999. (C) The  
679 distribution of genomic locations where the new TE insertions within individual nuclei  
680 fall.

681

## 682 **Fig 3. Lifespan of ubiquitous shRNA and CRISPRi knockdown of the**

### 683 **retrotransposons, *412* and *Roo***

684 (A) qPCR using SYBR green showing levels of *412* mRNA relative to *Rp49* (*Rpl32*) from  
685 adult flies expressing a control shRNA transgene under the control of Act5C-Gal4  
686 compared to the *412* shRNA knockdowns (Act5C>shRNA). The experiment was  
687 performed in five biological replicates. An unpaired t-test with Bonferroni correction was  
688 used. \*\* p=0.0018. \* p=0.0219. (B) Survival of the *412* shRNA lines compared to control  
689 shRNA driven ubiquitously by Act5C (Act>shRNA). Dunnett test. \*\*\*\*p <0.0001. (C)  
690 Median lifespan of the *412* shRNAs compared to control shRNA driven ubiquitously by  
691 Act5C (Act>shRNA). Gehan-Breslow-Wilcoxon test. \*\*\*\*p<0.0001. (D) Maximum  
692 lifespan of the *412* shRNAs compared to control shRNA driven ubiquitously by Act5C  
693 (Act>shRNA). Permutation test (95th percentile/top 5%) followed by two-sided t-test with  
694 correction for multiple comparisons. \*\*\*\*p<0.0001. \*\*\*p= 0.0001. (E) qPCR using SYBR  
695 green of *412*gRNA CRISPRi compared to the control gRNA control (Act5C>dcas9-  
696 KRAB) relative to *Rp49* (*Rpl32*). An unpaired t-test with Bonferroni correction was used.  
697 \* p=0.0269. (F) Survival of the CRISPRi driven ubiquitously by Act5C (Act>dcas9KRAB)  
698 with the *412*gRNA compared to control gRNA. Dunnett test. \*\*\*\* p <0.0001. (G) Median  
699 lifespan of the CRISPRi driven ubiquitously by Act5C (Act>dcas9KRAB) with the  
700 *412*gRNA compared to control gRNA. Gehan-Breslow-Wilcoxon test. \*\*\*\* p <0.0001. (H)  
701 Maximum lifespan of the of the CRISPRi driven ubiquitously by Act5C  
702 (Act>dcas9KRAB) with the *412*gRNA compared to control gRNA. Permutation test (95th  
703 percentile) followed by two-sided t-test with correction for multiple comparisons. \*  
704 p=0.0377. (I) qPCR using SYBR green of the *Roo* mRNA KD compared to the control  
705 shRNA control (Act5C>shRNA) relative to *Rp49* (*Rpl32*). The experiment was  
706 performed in six biological replicates. An unpaired t-test with Bonferroni correction was

707 used. \*\*  $p=0.0022$ . (J) Survival of the *Roo* shRNA compared to control shRNA driven  
708 ubiquitously by Act5C (Act>shRNA). Dunnett test. \*\*\*\*  $p < 0.0001$  (K) Median lifespan of  
709 the *Roo* shRNA compared to control shRNA driven ubiquitously by Act5C (Act>shRNA).  
710 Gehan-Breslow-Wilcoxon test. \*\*\*\*  $p < 0.0001$ . (L) Maximum lifespan of the *Roo* shRNA  
711 compared to control shRNA driven ubiquitously by Act5C (Act>shRNA). Permutation  
712 test (95th percentile) followed by two-sided t-test with correction for multiple  
713 comparisons. \*\*\*\*  $p < 0.0001$ .

714

#### 715 **Fig 4. Stress resistance assays of 412 and *Roo* knockdown animals**

716 (A) Act5c>shRNA day 18 measurement of locomotion via negative geotaxis assay. The  
717 percentages of flies in each third of the vial is displayed. Chi-square test for trend. \*  
718 (412#1)  $p=0.0428$ . ns (412#2)  $p=0.1434$ . ns (*Roo*)  $p=0.1934$ . (B) Act5c>shRNA day 40  
719 response to oxidative stress by feeding paraquat and measuring survival. Dunnett test.  
720 \*\*\*\* (412#1)  $p < 0.0001$ . ns (412#2)  $p=0.0702$ . ns (*Roo*)  $p > 0.9999$ . (C) Act5c>shRNA  
721 day 20 response to endoplasmic reticulum (ER) stress by feeding tunicamycin and  
722 measuring survival. Dunnett test. ns (412#1)  $p=0.0826$ . \*\* (412#2)  $p=0.0046$ . ns (*Roo*)  
723  $p=0.1721$ . (D) Act5c>shRNA day 40 response to starvation by only giving the flies  
724 access to water and measuring survival. Dunnett test. ns (412#1)  $p=0.8332$ . ns (412#2)  
725  $p=0.5694$ . ns (*Roo*)  $p=0.2239$ . (E) Act5c>shRNA day 20 response to cold stress by  
726 keeping flies at 4 degrees Celsius and measuring survival after 48-hours recovery. Each  
727 dot is a vial or replicate of approximately 20 flies. Fisher's exact test. ns (412#1)  
728  $p=0.0703$ . \* (412#2)  $p=0.0461$ . ns (*Roo*)  $p=0.6592$ . (F) Act5c>shRNA day 20 response  
729 to heat stress by keeping flies at 37 degrees Celsius and measuring survival after 48-



730 hours recovery. Each dot is a replicate of approximately 20 flies. Fisher's exact test. ns  
731 (412#1)  $p=0.0915$ . ns (412#2)  $p=0.7643$ . ns (Roo)  $p=0.5061$ . (G) Act5c>shRNA day  
732 25 measurement of fecundity. Data is displayed as average number of eggs laid per day  
733 over 5 days. Each dot represents a day for the number of flies in one vial. One-way  
734 ANOVA. ns (412#1)  $p=0.9925$ . ns (412#2)  $p=0.7231$ . ns (Roo)  $p=0.1803$ . (H)  
735 Act5c>shRNA day 25 measurement of fertility. Fertility index is calculated as number of  
736 progeny divided by number of eggs laid. Data is displayed as average fertility index over  
737 5 days. Each dot represents a day for the number of flies listed. One-way ANOVA. ns  
738 (412#1)  $p>0.9999$ . ns (412#2)  $p=0.5881$ . ns (Roo)  $p=0.9887$ .

739

#### 740 **Fig 5. Transcriptomic analysis of 412 and Roo knockdown animals**

741 (A) Volcano plot of differentially expressed genes (DEGs) from whole thorax of  
742 Act5c>412#1 shRNA knockdown animals compared to control shRNA animals. Genes  
743 with a false discovery rate (FDR)  $<0.05$  are highlighted in black and above the dashed  
744 line. Genes that are differentially expressed in both 412 and Roo knockdown animals  
745 (overlapping genes) are highlighted in red. (B) Volcano plot of differentially expressed  
746 genes (DEGs) from whole thorax of Act5c>Roo shRNA knockdown animals compared  
747 to control shRNA animals. Genes with a false discovery rate (FDR)  $<0.05$  are  
748 highlighted in black and above the dashed line. Genes that are differentially expressed  
749 in both 412 and Roo knockdown animals (overlapping genes) are highlighted in red. (C)  
750 Correlation of Log<sub>2</sub>FoldChange (Log<sub>2</sub>FC) of the overlapping DEGs between 412 and  
751 Roo knockdown animals.  $r=0.9461$ . Deming regression.  $p<0.0001$ . Serine proteases  
752 and AMPs that are also DEGS are enlarged and highlighted in purple. (D) Protein

753 clustering performed on the overlapping DEGs using String with single nodes removed  
754 and 1 cluster used. There is a serine protease cluster of genes interacting. (E) Heatmap  
755 of log2fold change (Log2FC) from RNA-seq data across samples of the *Jonah* (*Jon*)  
756 genes. The \* marked genes are significantly differentially expressed in both 412 and  
757 *Roo* knockdown thoraces. All other genes are significantly differentially expressed in  
758 just 412 knockdown thoraces. (F) Heatmap of log2fold change (Log2FC) across  
759 samples of the antimicrobial peptides (AMPs). The \* marked genes are significantly  
760 differentially expressed in both 412 and *Roo* knockdown thoraces. All other genes are  
761 significantly differentially expressed in just 412 knockdown thoraces.

762

## 763 REFERENCES

- 764 1. Health, United States, 2019, (2021).  
765 2. Dong X, Milholland B, Vijg J. Evidence for a limit to human lifespan. *Nature*.  
766 2016;538(7624):257-9.  
767 3. Vijg J, Suh Y. Genome instability and aging. *Annu Rev Physiol*. 2013;75:645-68.  
768 4. López-Otín C, Blasco MA, Partridge L, Serrano M, Kroemer G. The hallmarks of aging.  
769 *Cell*. 2013;153(6):1194-217.  
770 5. Lander ES, Linton LM, Birren B, Nusbaum C, Zody MC, Baldwin J, et al. Initial sequencing  
771 and analysis of the human genome. *Nature*. 2001;409(6822):860-921.  
772 6. Miao B, Fu S, Lyu C, Gontarz P, Wang T, Zhang B. Tissue-specific usage of transposable  
773 element-derived promoters in mouse development. *Genome Biol*. 2020;21(1):255.  
774 7. Hoskins RA, Smith CD, Carlson JW, Carvalho AB, Halpern A, Kaminker JS, et al.  
775 Heterochromatic sequences in a *Drosophila* whole-genome shotgun assembly. *Genome Biol*.  
776 2002;3(12):Research0085.  
777 8. McCullers TJ, Steiniger M. Transposable elements in *Drosophila*. *Mob Genet Elements*.  
778 2017;7(3):1-18.  
779 9. Smith CD, Shu S, Mungall CJ, Karpen GH. The Release 5.1 annotation of *Drosophila*  
780 *melanogaster* heterochromatin. *Science*. 2007;316(5831):1586-91.  
781 10. De Cecco M, Criscione SW, Peckham EJ, Hillenmeyer S, Hamm EA, Manivannan J, et al.  
782 Genomes of replicatively senescent cells undergo global epigenetic changes leading to gene  
783 silencing and activation of transposable elements. *Aging Cell*. 2013;12(2):247-56.

- 784 11. Chen H, Zheng X, Xiao D, Zheng Y. Age-associated de-repression of retrotransposons in  
785 the *Drosophila* fat body, its potential cause and consequence. *Aging Cell*. 2016;15(3):542-52.
- 786 12. Pray LA. Transposons: The Jumping Genes. *Nature Education*. 2008;1(1)(204).
- 787 13. Levin HL, Moran JV. Dynamic interactions between transposable elements and their  
788 hosts. *Nat Rev Genet*. 2011;12(9):615-27.
- 789 14. Simon M, Van Meter M, Ablueva J, Ke Z, Gonzalez RS, Taguchi T, et al. LINE1  
790 Derepression in Aged Wild-Type and SIRT6-Deficient Mice Drives Inflammation. *Cell Metab*.  
791 2019;29(4):871-85.e5.
- 792 15. De Cecco M, Ito T, Petrashen AP, Elias AE, Skvir NJ, Criscione SW, et al. L1 drives IFN in  
793 senescent cells and promotes age-associated inflammation. *Nature*. 2019;566(7742):73-8.
- 794 16. Miller KN, Victorelli SG, Salmonowicz H, Dasgupta N, Liu T, Passos JF, et al. Cytoplasmic  
795 DNA: sources, sensing, and role in aging and disease. *Cell*. 2021;184(22):5506-26.
- 796 17. Janssen A, Colmenares SU, Karpen GH. Heterochromatin: Guardian of the Genome.  
797 *Annu Rev Cell Dev Biol*. 2018;34:265-88.
- 798 18. Gorbunova V, Seluanov A, Mita P, McKerrow W, Fenyö D, Boeke JD, et al. The role of  
799 retrotransposable elements in ageing and age-associated diseases. *Nature*. 2021;596(7870):43-  
800 53.
- 801 19. Gorbunova V, Boeke JD, Helfand SL, Sedivy JM. Human Genomics. Sleeping dogs of the  
802 genome. *Science*. 2014;346(6214):1187-8.
- 803 20. Li W, Prazak L, Chatterjee N, Grüniger S, Krug L, Theodorou D, et al. Activation of  
804 transposable elements during aging and neuronal decline in *Drosophila*. *Nat Neurosci*.  
805 2013;16(5):529-31.
- 806 21. Sioud M. RNA Interference: Story and Mechanisms. *Methods Mol Biol*. 2021;2282:1-15.
- 807 22. Wang JH, Valanne S, Rämét M. *Drosophila* as a model for antiviral immunity. *World J*  
808 *Biol Chem*. 2010;1(5):151-9.
- 809 23. Wood JG, Jones BC, Jiang N, Chang C, Hosier S, Wickremesinghe P, et al. Chromatin-  
810 modifying genetic interventions suppress age-associated transposable element activation and  
811 extend life span in *Drosophila*. *Proc Natl Acad Sci U S A*. 2016;113(40):11277-82.
- 812 24. Yang N, Srivastav SP, Rahman R, Ma Q, Dayama G, Li S, et al. Transposable element  
813 landscapes in aging *Drosophila*. *PLoS Genet*. 2022;18(3):e1010024.
- 814 25. Driver CJ, Vogrig DJ. Apparent retardation of aging in *Drosophila melanogaster* by  
815 inhibitors of reverse transcriptase. *Ann N Y Acad Sci*. 1994;717:189-97.
- 816 26. Chang YH, Keegan RM, Prazak L, Dubnau J. Cellular labeling of endogenous retrovirus  
817 replication (CLEVR) reveals de novo insertions of the gypsy retrotransposable element in cell  
818 culture and in both neurons and glial cells of aging fruit flies. *PLoS Biol*. 2019;17(5):e3000278.
- 819 27. Siudeja K, van den Beek M, Riddiford N, Boumard B, Wurmser A, Stefanutti M, et al.  
820 Unraveling the features of somatic transposition in the *Drosophila* intestine. *Embo j*.  
821 2021;40(9):e106388.
- 822 28. Qiu S, Xiao C, Meldrum Robertson R. Different age-dependent performance in  
823 *Drosophila* wild-type Canton-S and the white mutant w1118 flies. *Comp Biochem Physiol A Mol*  
824 *Integr Physiol*. 2017;206:17-23.
- 825 29. Periquet G, Lemeunier F, Bigot Y, Hamelin MH, Bazin C, Ladevèze V, et al. The  
826 evolutionary genetics of the hobo transposable element in the *Drosophila melanogaster*  
827 complex. *Genetica*. 1994;93(1-3):79-90.

- 828 30. Josephson RK, Malamud JG, Stokes DR. Asynchronous muscle: a primer. *J Exp Biol.*  
829 2000;203(Pt 18):2713-22.
- 830 31. Agianian B, Krzic U, Qiu F, Linke WA, Leonard K, Bullard B. A troponin switch that  
831 regulates muscle contraction by stretch instead of calcium. *Embo j.* 2004;23(4):772-9.
- 832 32. Jawkar S, Nongthomba U. Indirect flight muscles in *Drosophila melanogaster* as a  
833 tractable model to study muscle development and disease. *Int J Dev Biol.* 2020;64(1-2-3):167-  
834 73.
- 835 33. Demontis F, Patel VK, Swindell WR, Perrimon N. Intertissue control of the nucleolus via a  
836 myokine-dependent longevity pathway. *Cell Rep.* 2014;7(5):1481-94.
- 837 34. Singh SH, Kumar P, Ramachandra NB, Nongthomba U. Roles of the troponin isoforms  
838 during indirect flight muscle development in *Drosophila*. *J Genet.* 2014;93(2):379-88.
- 839 35. Di Franco C, Galuppi D, Junakovic N. Genomic distribution of transposable elements  
840 among individuals of an inbred *Drosophila* line. *Genetica.* 1992;86(1-3):1-11.
- 841 36. Gramates LS, Agapite J, Attrill H, Calvi BR, Crosby MA, Dos Santos G, et al. Fly Base: a  
842 guided tour of highlighted features. *Genetics.* 2022;220(4).
- 843 37. Broughton SJ, Piper MD, Ikeya T, Bass TM, Jacobson J, Driege Y, et al. Longer lifespan,  
844 altered metabolism, and stress resistance in *Drosophila* from ablation of cells making insulin-  
845 like ligands. *Proc Natl Acad Sci U S A.* 2005;102(8):3105-10.
- 846 38. Cassidy D, Epiney DG, Salameh C, Zhou LT, Salomon RN, Schirmer AE, et al. Evidence for  
847 premature aging in a *Drosophila* model of Werner syndrome. *Exp Gerontol.* 2019;127:110733.
- 848 39. Sun Y, Yolitz J, Wang C, Spangler E, Zhan M, Zou S. Aging studies in *Drosophila*  
849 *melanogaster*. *Methods Mol Biol.* 2013;1048:77-93.
- 850 40. Chow CY, Wolfner MF, Clark AG. Using natural variation in *Drosophila* to discover  
851 previously unknown endoplasmic reticulum stress genes. *Proc Natl Acad Sci U S A.*  
852 2013;110(22):9013-8.
- 853 41. Jasienska G, Nenko I, Jasienski M. Daughters increase longevity of fathers, but daughters  
854 and sons equally reduce longevity of mothers. *Am J Hum Biol.* 2006;18(3):422-5.
- 855 42. Huang da W, Sherman BT, Lempicki RA. Systematic and integrative analysis of large gene  
856 lists using DAVID bioinformatics resources. *Nat Protoc.* 2009;4(1):44-57.
- 857 43. Sherman BT, Hao M, Qiu J, Jiao X, Baseler MW, Lane HC, et al. DAVID: a web server for  
858 functional enrichment analysis and functional annotation of gene lists (2021 update). *Nucleic*  
859 *Acids Res.* 2022;50(W1):W216-21.
- 860 44. Szklarczyk D, Gable AL, Nastou KC, Lyon D, Kirsch R, Pyysalo S, et al. The STRING  
861 database in 2021: customizable protein-protein networks, and functional characterization of  
862 user-uploaded gene/measurement sets. *Nucleic Acids Res.* 2021;49(D1):D605-d12.
- 863 45. Miguel-Aliaga I, Jasper H, Lemaitre B. Anatomy and Physiology of the Digestive Tract of  
864 *Drosophila melanogaster*. *Genetics.* 2018;210(2):357-96.
- 865 46. Akam ME, Carlson JR. The detection of Jonah gene transcripts in *Drosophila* by in situ  
866 hybridization. *Embo j.* 1985;4(1):155-61.
- 867 47. Yadav S, Eleftherianos I. Participation of the Serine Protease Jonah66Ci in the *Drosophila*  
868 Antinematode Immune Response. *Infect Immun.* 2019;87(9).
- 869 48. Carpenter J, Hutter S, Baines JF, Roller J, Saminadin-Peter SS, Parsch J, et al. The  
870 transcriptional response of *Drosophila melanogaster* to infection with the sigma virus  
871 (Rhabdoviridae). *PLoS One.* 2009;4(8):e6838.

- 872 49. Ward JR, Khan A, Torres S, Crawford B, Nock S, Frisbie T, et al. Condensin I and  
873 condensin II proteins form a LINE-1 dependent super condensin complex and cooperate to  
874 repress LINE-1. *Nucleic Acids Res.* 2022.
- 875 50. Rigal J, Martin Anduaga A, Bitman E, Rivellesse E, Kadener S, Marr MT. Artificially  
876 stimulating retrotransposon activity increases mortality and accelerates a subset of aging  
877 phenotypes in *Drosophila*. *Elife.* 2022;11.
- 878 51. Scott EC, Gardner EJ, Masood A, Chuang NT, Vertino PM, Devine SE. A hot L1  
879 retrotransposon evades somatic repression and initiates human colorectal cancer. *Genome Res.*  
880 2016;26(6):745-55.
- 881 52. Cajuso T, Sulo P, Tanskanen T, Katainen R, Taira A, Hänninen UA, et al. Retrotransposon  
882 insertions can initiate colorectal cancer and are associated with poor survival. *Nat Commun.*  
883 2019;10(1):4022.
- 884 53. Hancks DC, Kazazian HH, Jr. Roles for retrotransposon insertions in human disease. *Mob*  
885 *DNA.* 2016;7:9.
- 886 54. Martin M, Hiroyasu A, Guzman RM, Roberts SA, Goodman AG. Analysis of *Drosophila*  
887 STING Reveals an Evolutionarily Conserved Antimicrobial Function. *Cell Rep.* 2018;23(12):3537-  
888 50.e6.
- 889 55. Khor S, Cai D. Control of lifespan and survival by *Drosophila* NF- $\kappa$ B signaling through  
890 neuroendocrine cells and neuroblasts. *Aging (Albany NY).* 2020;12(24):24604-22.
- 891 56. Valanne S, Wang JH, Rämetsä M. The *Drosophila* Toll signaling pathway. *J Immunol.*  
892 2011;186(2):649-56.
- 893 57. Myllymäki H, Valanne S, Rämetsä M. The *Drosophila* imd signaling pathway. *J Immunol.*  
894 2014;192(8):3455-62.
- 895 58. Lin YR, Parikh H, Park Y. Stress resistance and lifespan enhanced by downregulation of  
896 antimicrobial peptide genes in the Imd pathway. *Aging (Albany NY).* 2018;10(4):622-31.
- 897 59. Hu Y, Flockhart I, Vinayagam A, Bergwitz C, Berger B, Perrimon N, et al. An integrative  
898 approach to ortholog prediction for disease-focused and other functional studies. *BMC*  
899 *Bioinformatics.* 2011;12:357.
- 900 60. Hu Y, Comjean A, Roesel C, Vinayagam A, Flockhart I, Zirin J, et al. FlyRNAi.org—the  
901 database of the *Drosophila* RNAi screening center and transgenic RNAi project: 2017 update.  
902 *Nucleic Acids Res.* 2017;45(D1):D672-d8.
- 903 61. Hu Y, Comjean A, Rodiger J, Liu Y, Gao Y, Chung V, et al. FlyRNAi.org—the database of  
904 the *Drosophila* RNAi screening center and transgenic RNAi project: 2021 update. *Nucleic Acids*  
905 *Research.* 2020;49(D1):D908-D15.
- 906 62. Parekh VJ, Rathod VK, Pandit AB. 2.10 - Substrate Hydrolysis: Methods, Mechanism, and  
907 Industrial Applications of Substrate Hydrolysis. In: Moo-Young M, editor. *Comprehensive*  
908 *Biotechnology (Second Edition)*. Burlington: Academic Press; 2011. p. 103-18.
- 909 63. Shah D, Mital K. The Role of Trypsin:Chymotrypsin in Tissue Repair. *Adv Ther.*  
910 2018;35(1):31-42.
- 911 64. Perkins LA, Holderbaum L, Tao R, Hu Y, Sopko R, McCall K, et al. The Transgenic RNAi  
912 Project at Harvard Medical School: Resources and Validation. *Genetics.* 2015;201(3):843-52.
- 913 65. Foveau N. DSIR Designer of small interfering RNA Cartes d'Identite des Tumeurs"  
914 program (CIT): Ligue Nationale Contre le Cancer; 2007 [

- 915 66. Port F, Bullock SL. Augmenting CRISPR applications in *Drosophila* with tRNA-flanked  
916 sgRNAs. *Nat Methods*. 2016;13(10):852-4.
- 917 67. Port F, Chen HM, Lee T, Bullock SL. Optimized CRISPR/Cas tools for efficient germline  
918 and somatic genome engineering in *Drosophila*. *Proc Natl Acad Sci U S A*. 2014;111(29):E2967-  
919 76.
- 920 68. Port F, Muschalik N, Bullock SL. Systematic Evaluation of *Drosophila* CRISPR Tools  
921 Reveals Safe and Robust Alternatives to Autonomous Gene Drives in Basic Research. *G3*  
922 (Bethesda). 2015;5(7):1493-502.
- 923 69. Port F, Starostecka M, Boutros M. Multiplexed conditional genome editing with Cas12a  
924 in *Drosophila*. *Proc Natl Acad Sci U S A*. 2020;117(37):22890-9.
- 925 70. Port F, Strein C, Stricker M, Rauscher B, Heigwer F, Zhou J, et al. A large-scale resource  
926 for tissue-specific CRISPR mutagenesis in *Drosophila*. *Elife*. 2020;9.
- 927 71. Heigwer F, Port F, Boutros M. RNA Interference (RNAi) Screening in *Drosophila*.  
928 *Genetics*. 2018;208(3):853-74.
- 929 72. Akbari OS, Bellen HJ, Bier E, Bullock SL, Burt A, Church GM, et al. BIOSAFETY.  
930 Safeguarding gene drive experiments in the laboratory. *Science*. 2015;349(6251):927-9.
- 931 73. Kim D, Paggi JM, Park C, Bennett C, Salzberg SL. Graph-based genome alignment and  
932 genotyping with HISAT2 and HISAT-genotype. *Nat Biotechnol*. 2019;37(8):907-15.
- 933 74. Edgar R, Domrachev M, Lash AE. Gene Expression Omnibus: NCBI gene expression and  
934 hybridization array data repository. *Nucleic Acids Res*. 2002;30(1):207-10.
- 935 75. Ghildiyal M, Seitz H, Horwich MD, Li C, Du T, Lee S, et al. Endogenous siRNAs derived  
936 from transposons and mRNAs in *Drosophila* somatic cells. *Science*. 2008;320(5879):1077-81.
- 937 76. Klein JD, Qu C, Yang X, Fan Y, Tang C, Peng JC. c-Fos Repression by Piwi Regulates  
938 *Drosophila* Ovarian Germline Formation and Tissue Morphogenesis. *PLoS Genet*.  
939 2016;12(9):e1006281.
- 940 77. Matsumoto N, Sato K, Nishimasu H, Namba Y, Miyakubi K, Dohmae N, et al. Crystal  
941 Structure and Activity of the Endoribonuclease Domain of the piRNA Pathway Factor  
942 Maelstrom. *Cell Rep*. 2015;11(3):366-75.
- 943 78. Kalmykova AI, Klenov MS, Gvozdev VA. Argonaute protein PIWI controls mobilization of  
944 retrotransposons in the *Drosophila* male germline. *Nucleic Acids Res*. 2005;33(6):2052-9.
- 945 79. Hur JK, Luo Y, Moon S, Ninova M, Marinov GK, Chung YD, et al. Splicing-independent  
946 loading of TREX on nascent RNA is required for efficient expression of dual-strand piRNA  
947 clusters in *Drosophila*. *Genes Dev*. 2016;30(7):840-55.
- 948 80. Drelon C, Rogers MF, Belalcazar HM, Secombe J. The histone demethylase KDM5  
949 controls developmental timing in *Drosophila* by promoting prothoracic gland endocycles.  
950 *Development*. 2019;146(24).
- 951 81. Dufourt J, Dennis C, Boivin A, Gueguen N, Théron E, Goriaux C, et al. Spatio-temporal  
952 requirements for transposable element piRNA-mediated silencing during *Drosophila* oogenesis.  
953 *Nucleic Acids Res*. 2014;42(4):2512-24.
- 954 82. Czech B, Malone CD, Zhou R, Stark A, Schlingeheyde C, Dus M, et al. An endogenous  
955 small interfering RNA pathway in *Drosophila*. *Nature*. 2008;453(7196):798-802.
- 956 83. Corces MR, Trevino AE, Hamilton EG, Greenside PG, Sinnott-Armstrong NA, Vesuna S, et  
957 al. An improved ATAC-seq protocol reduces background and enables interrogation of frozen  
958 tissues. *Nat Methods*. 2017;14(10):959-62.

- 959 84. Dong X, Zhang L, Milholland B, Lee M, Maslov AY, Wang T, et al. Accurate identification  
960 of single-nucleotide variants in whole-genome-amplified single cells. *Nat Methods*.  
961 2017;14(5):491-3.
- 962 85. Dean FB, Hosono S, Fang L, Wu X, Faruqi AF, Bray-Ward P, et al. Comprehensive human  
963 genome amplification using multiple displacement amplification. *Proc Natl Acad Sci U S A*.  
964 2002;99(8):5261-6.
- 965 86. Gundry M, Li W, Maqbool SB, Vijg J. Direct, genome-wide assessment of DNA mutations  
966 in single cells. *Nucleic Acids Res*. 2012;40(5):2032-40.
- 967 87. Li H, Durbin R. Fast and accurate short read alignment with Burrows-Wheeler transform.  
968 *Bioinformatics*. 2009;25(14):1754-60.
- 969 88. Li H, Handsaker B, Wysoker A, Fennell T, Ruan J, Homer N, et al. The Sequence  
970 Alignment/Map format and SAMtools. *Bioinformatics*. 2009;25(16):2078-9.
- 971 89. Bao W, Kojima KK, Kohany O. Repbase Update, a database of repetitive elements in  
972 eukaryotic genomes. *Mob DNA*. 2015;6:11.
- 973 90. Quinlan AR, Hall IM. BEDTools: a flexible suite of utilities for comparing genomic  
974 features. *Bioinformatics*. 2010;26(6):841-2.
- 975 91. Li D, Liu CM, Luo R, Sadakane K, Lam TW. MEGAHIT: an ultra-fast single-node solution  
976 for large and complex metagenomics assembly via succinct de Bruijn graph. *Bioinformatics*.  
977 2015;31(10):1674-6.
- 978 92. Yu G, Wang LG, He QY. ChIPseeker: an R/Bioconductor package for ChIP peak  
979 annotation, comparison and visualization. *Bioinformatics*. 2015;31(14):2382-3.
- 980

# Figure 1

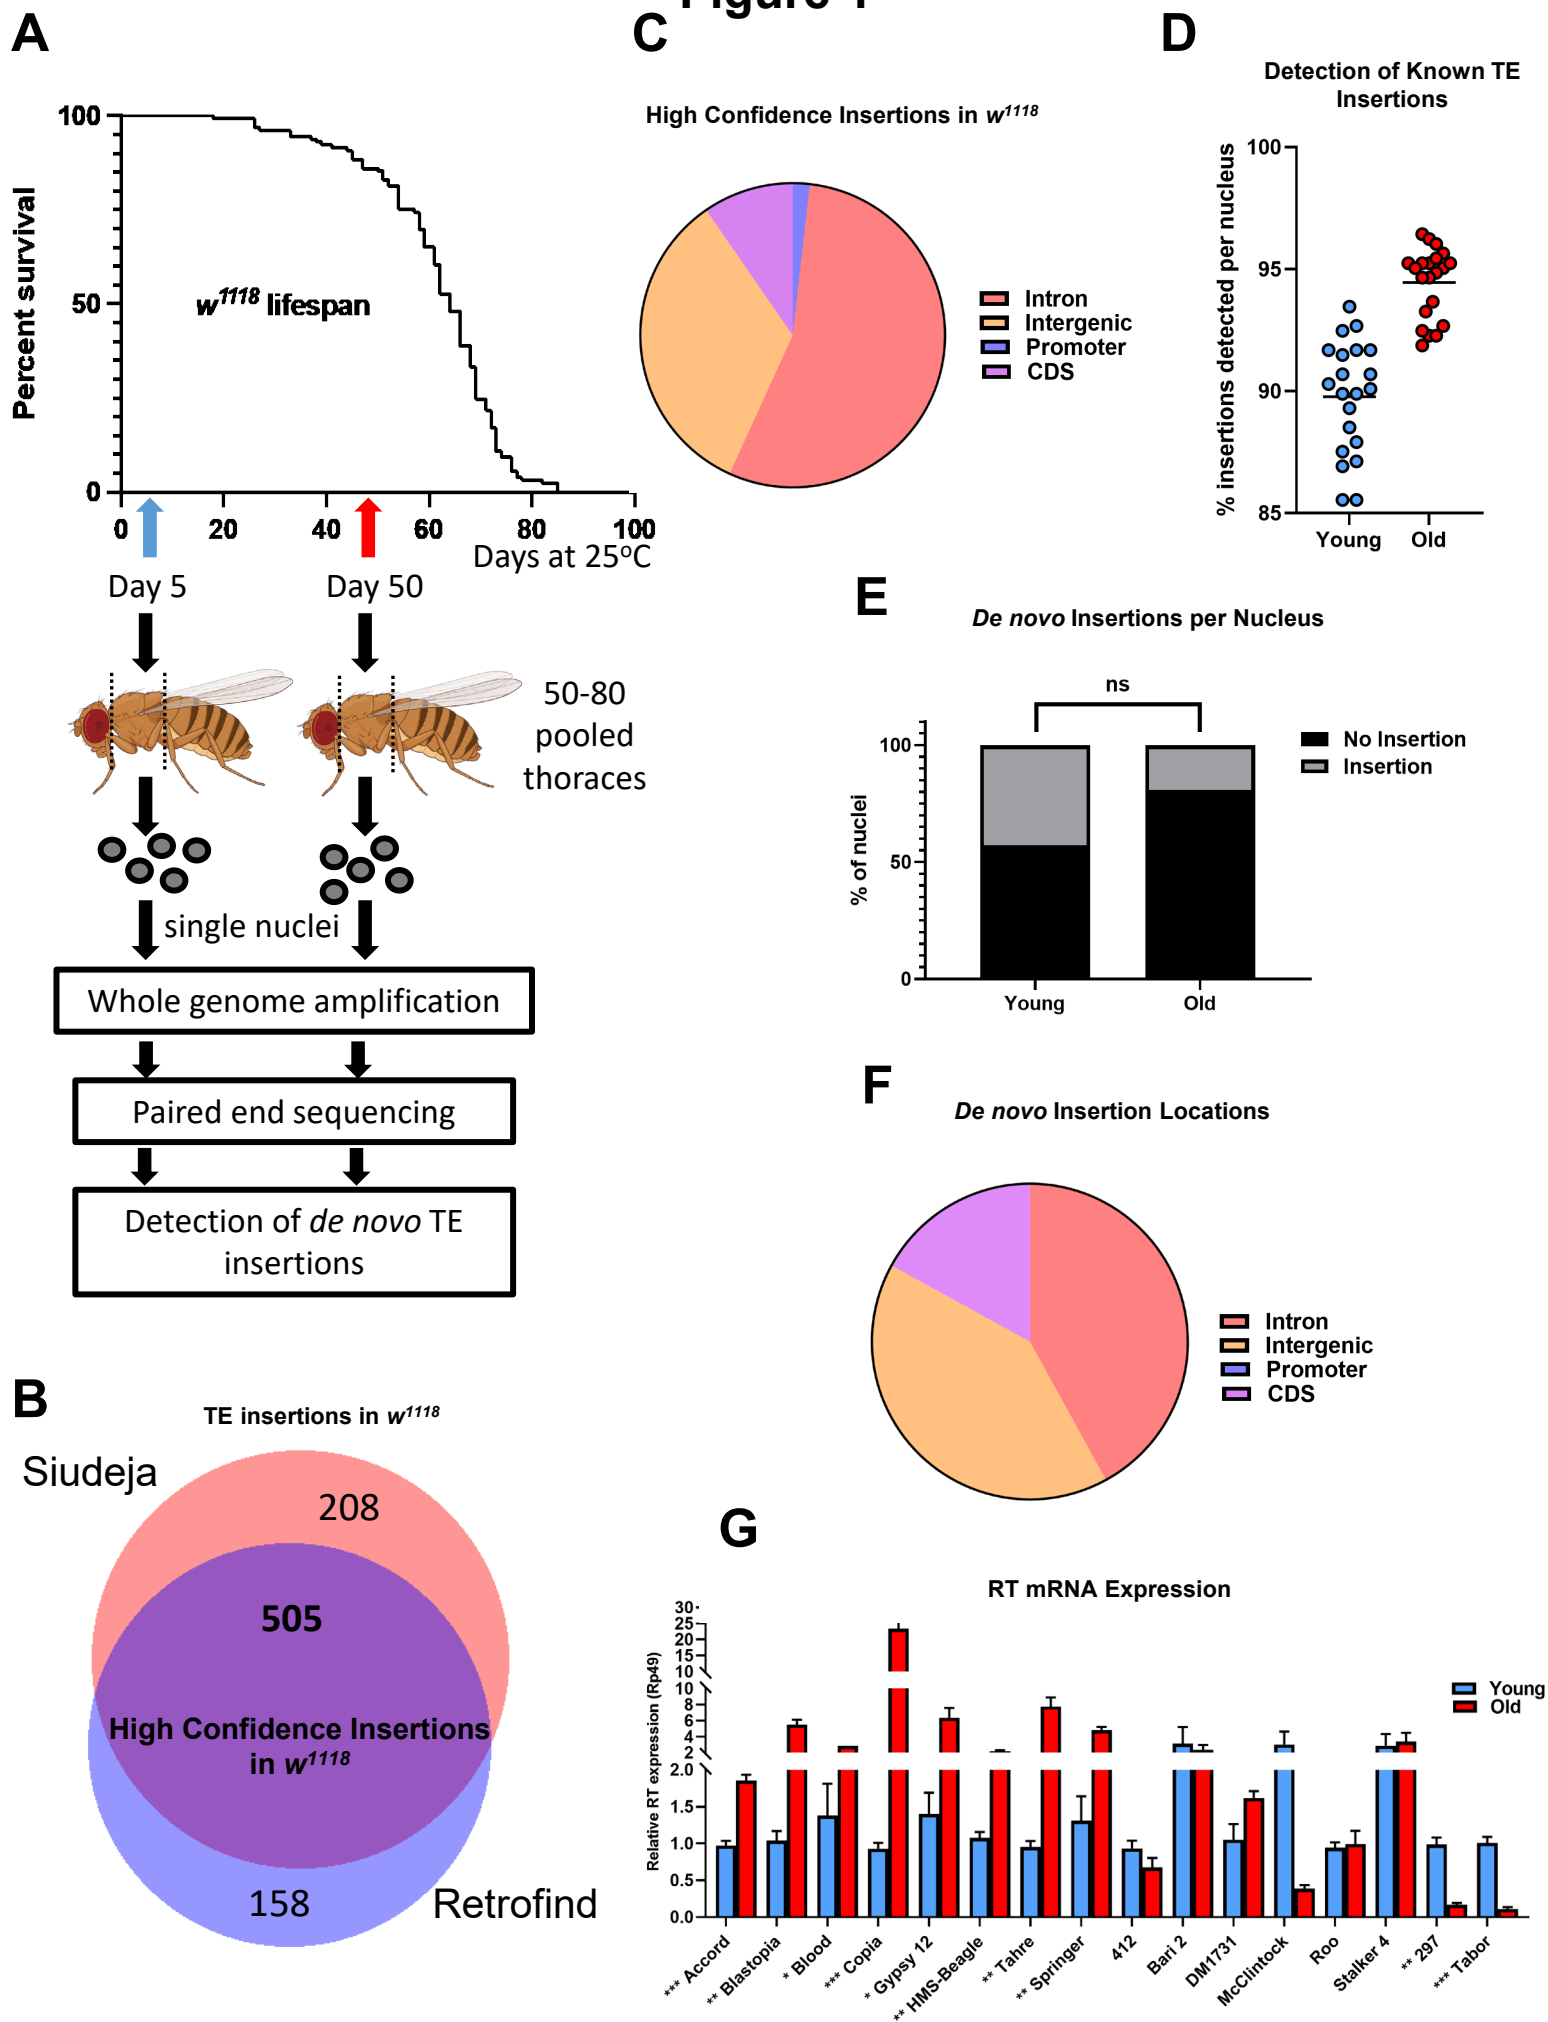



## Figure 2

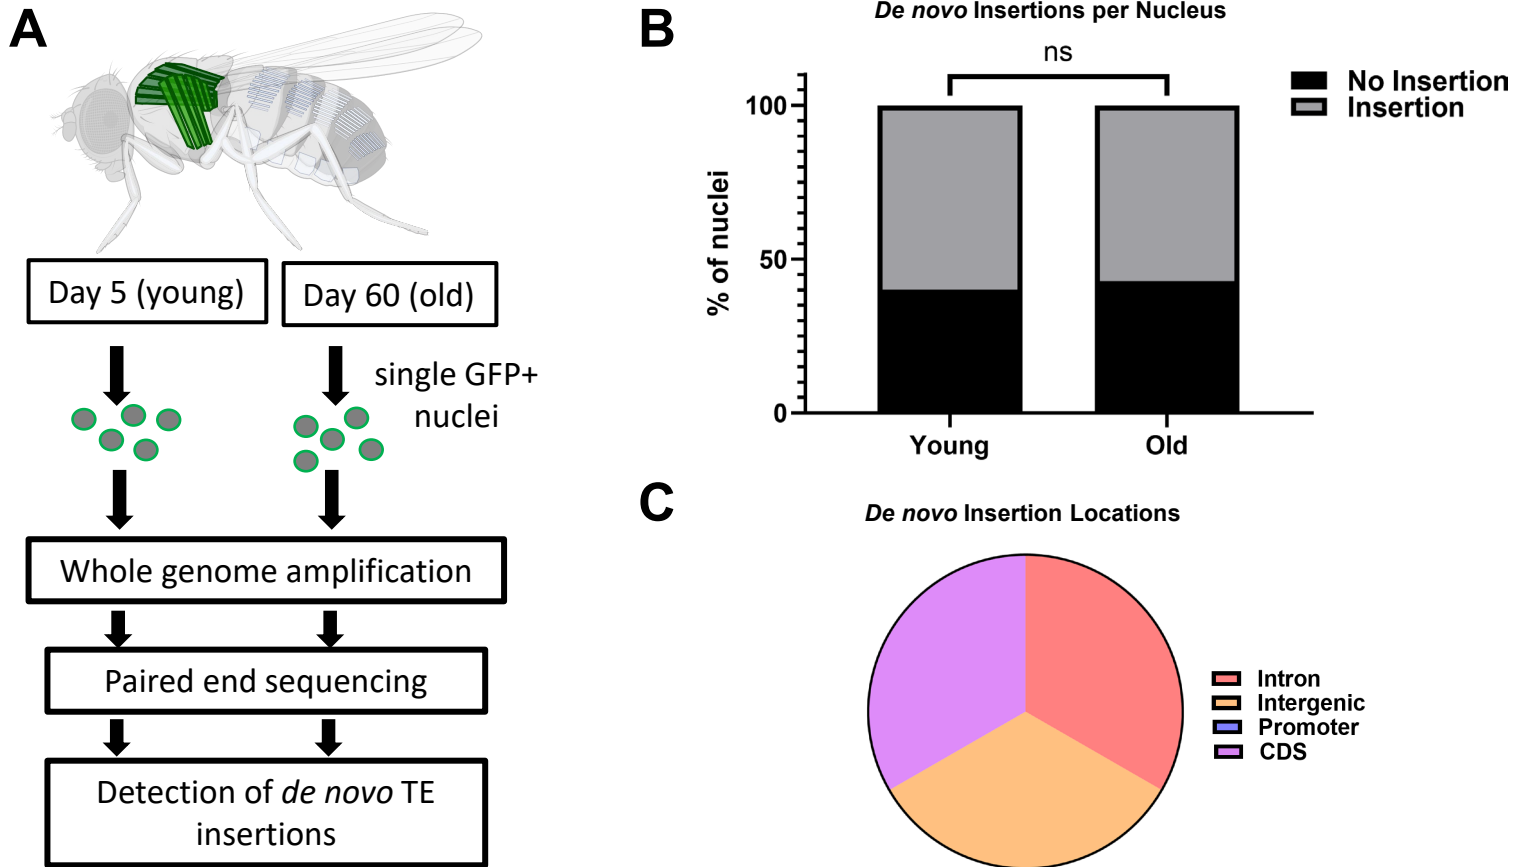

# Figure 3

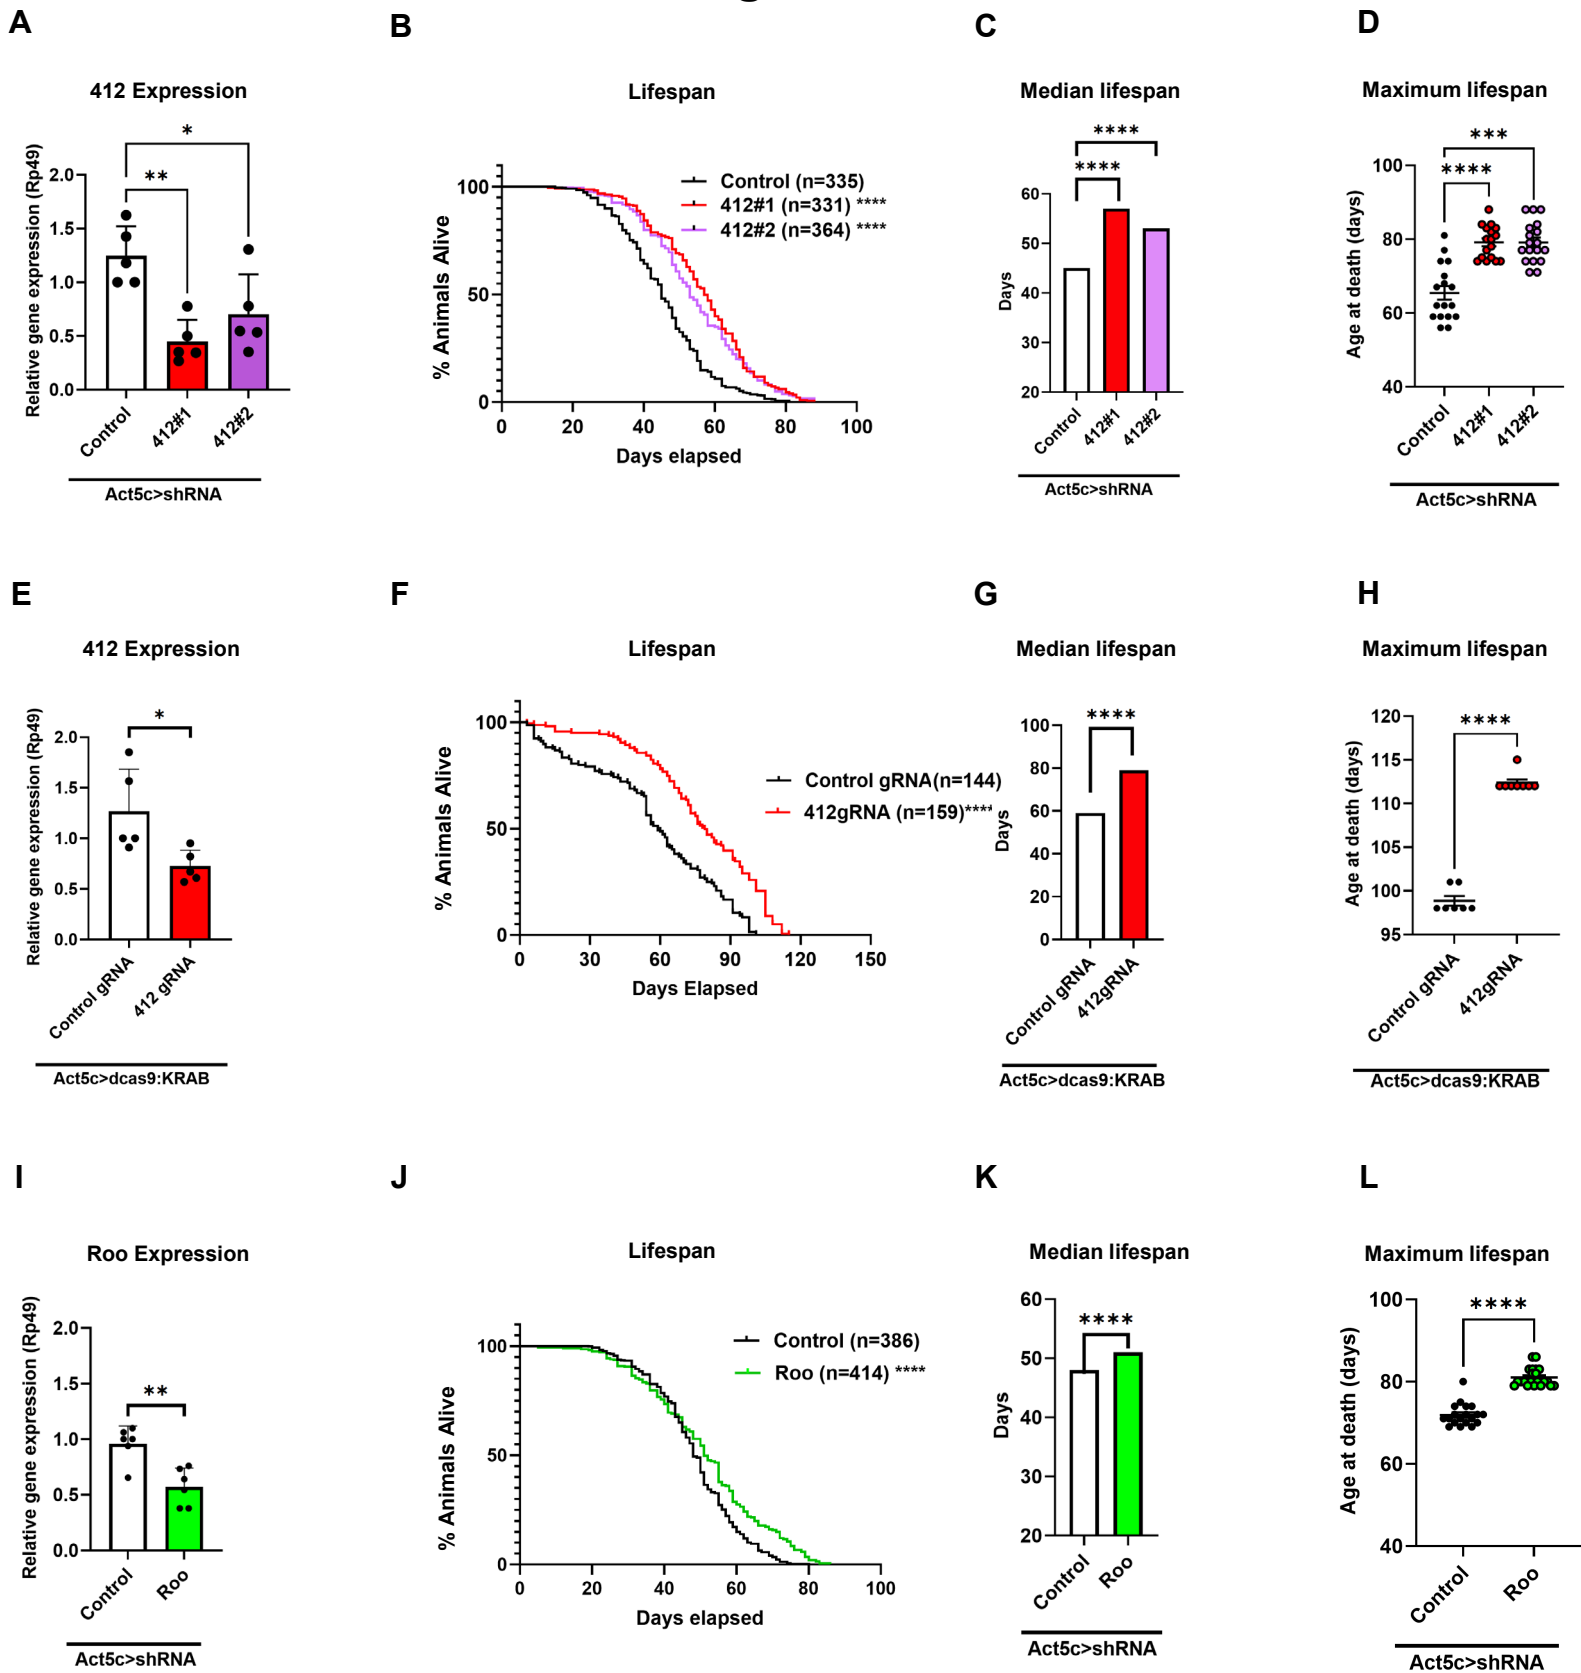

# Figure 4

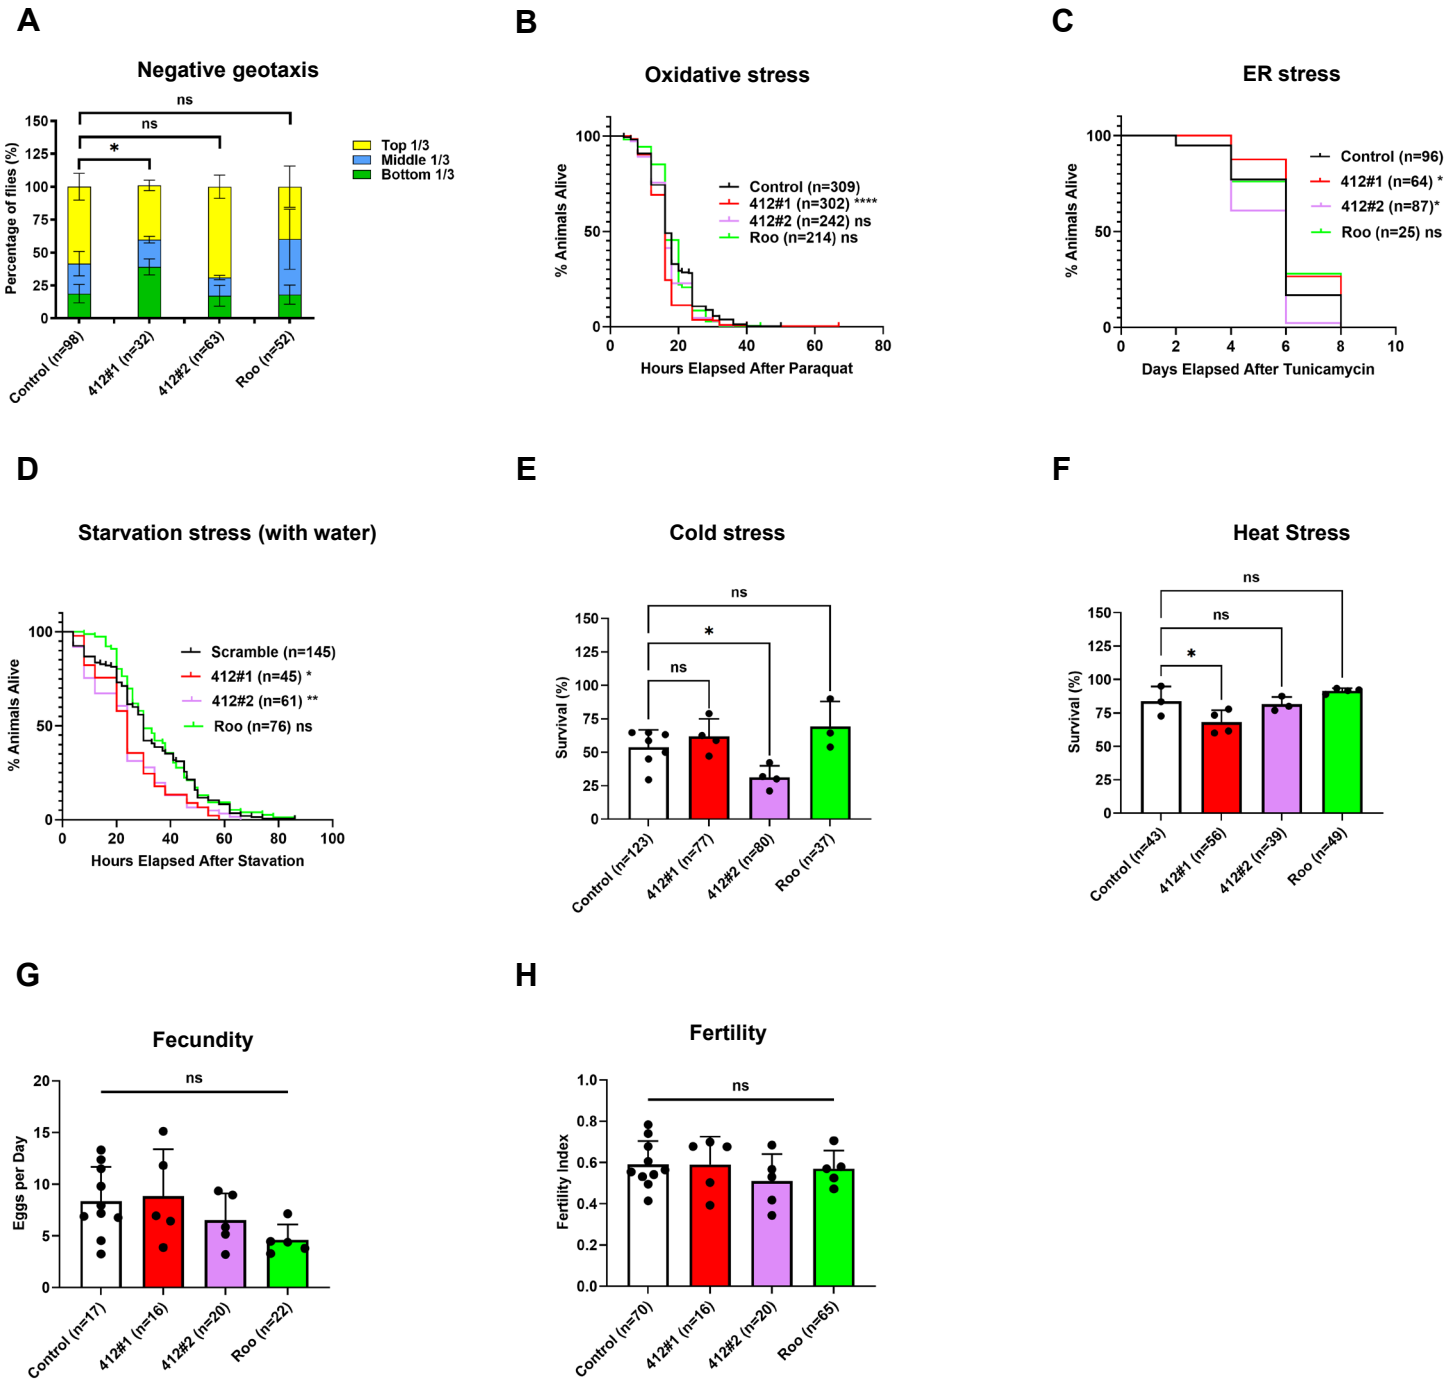

## Figure 5

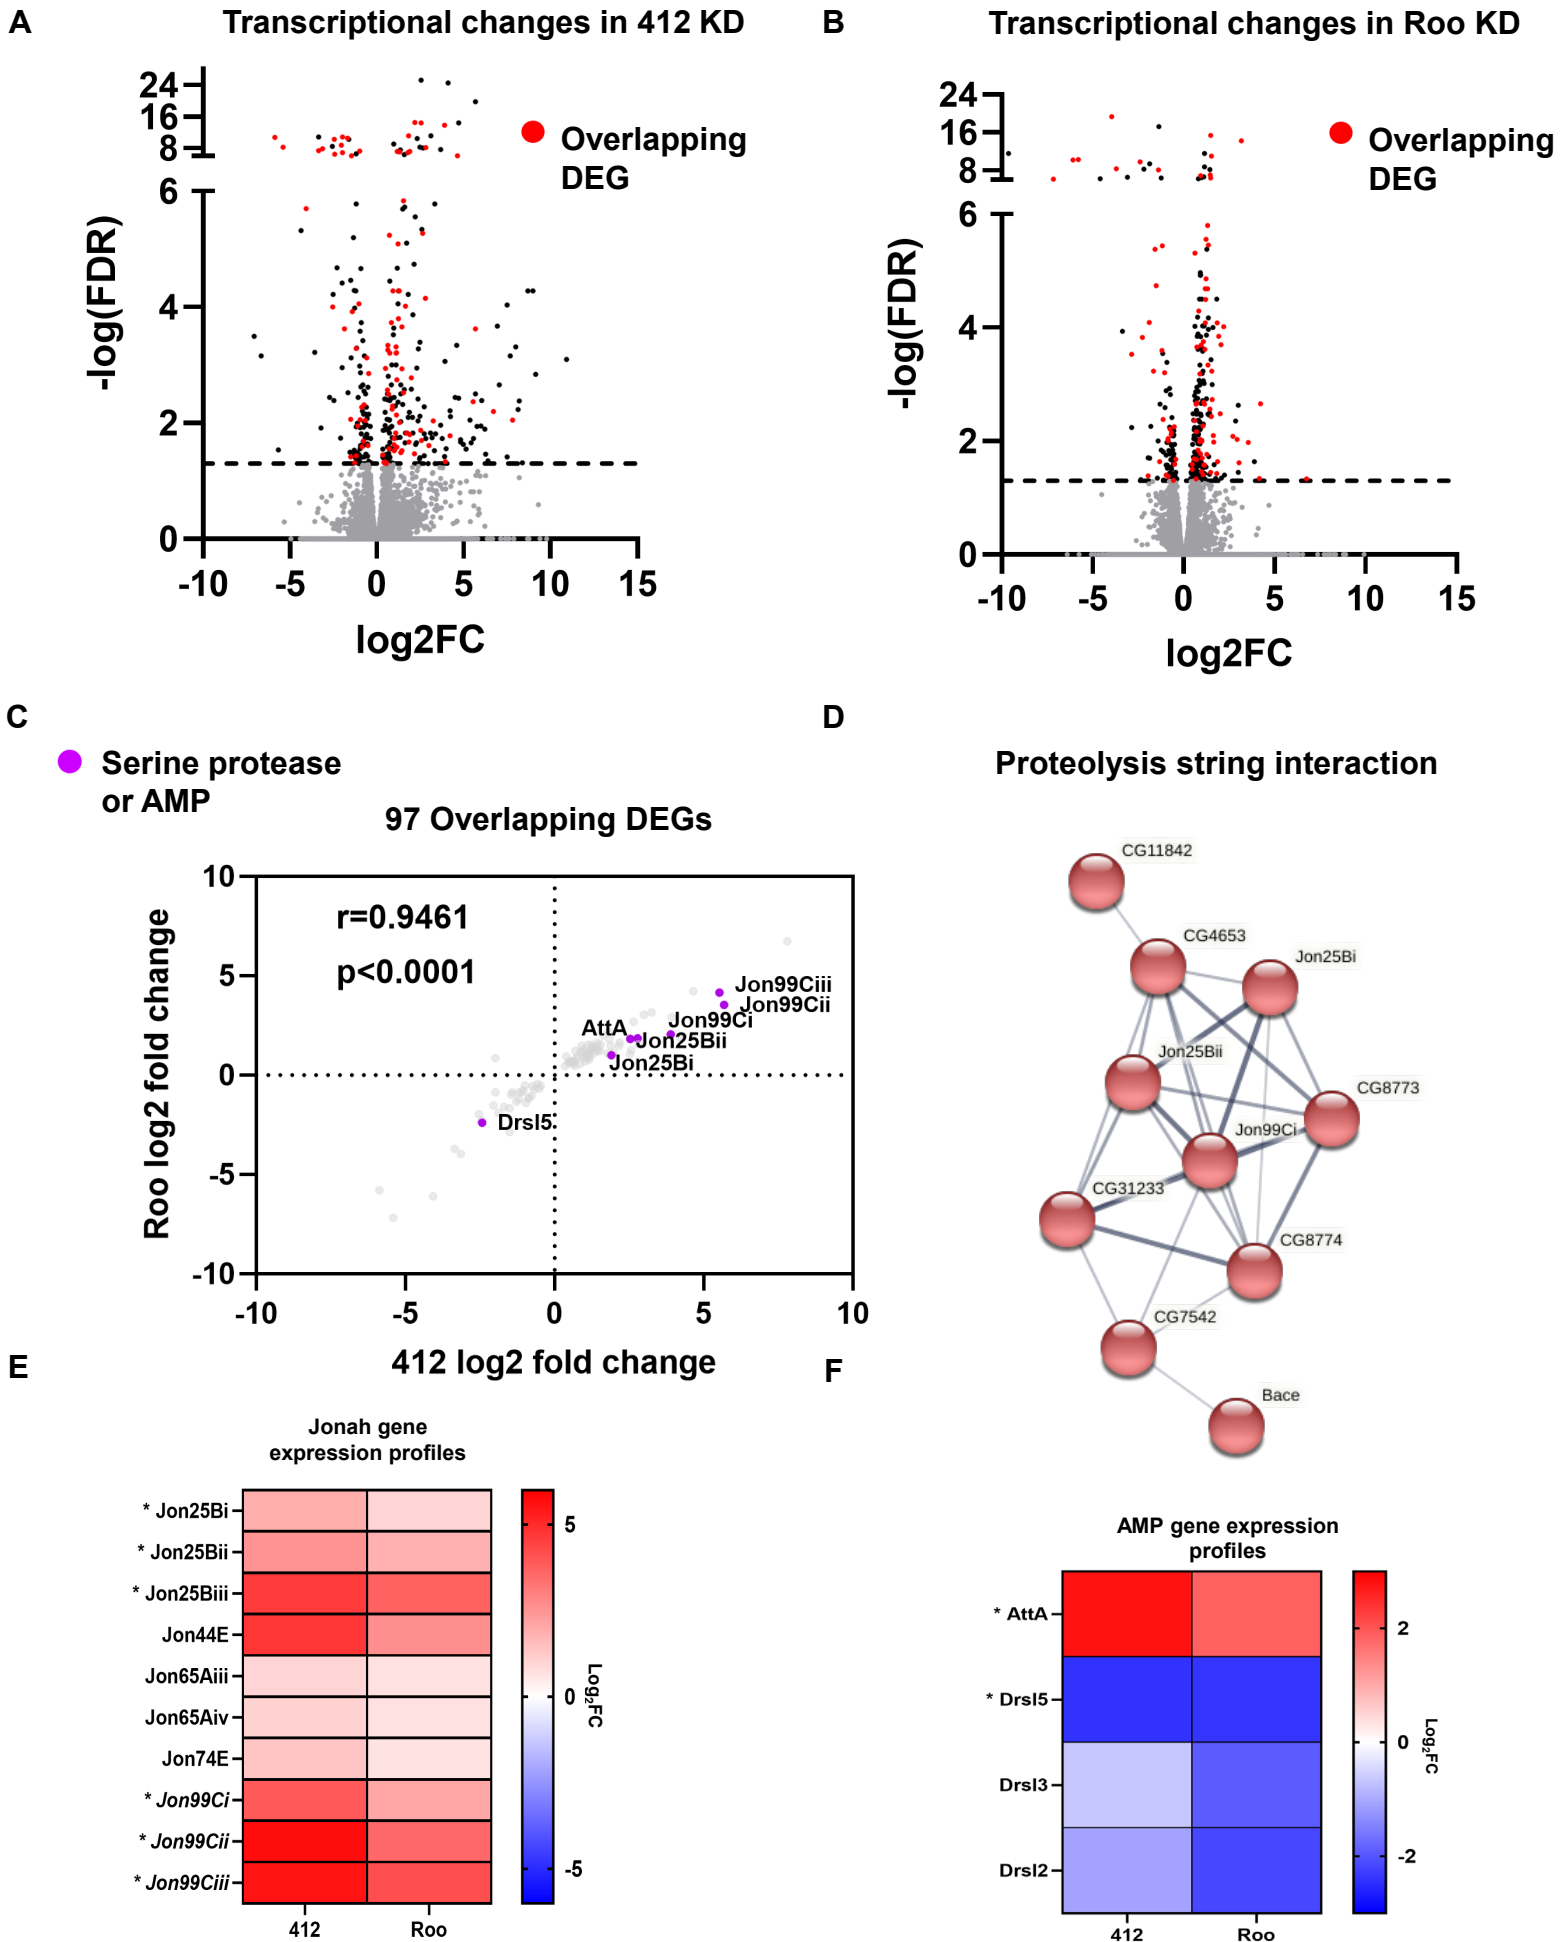

# Supplemental Figure 1

Act5c>shRNA

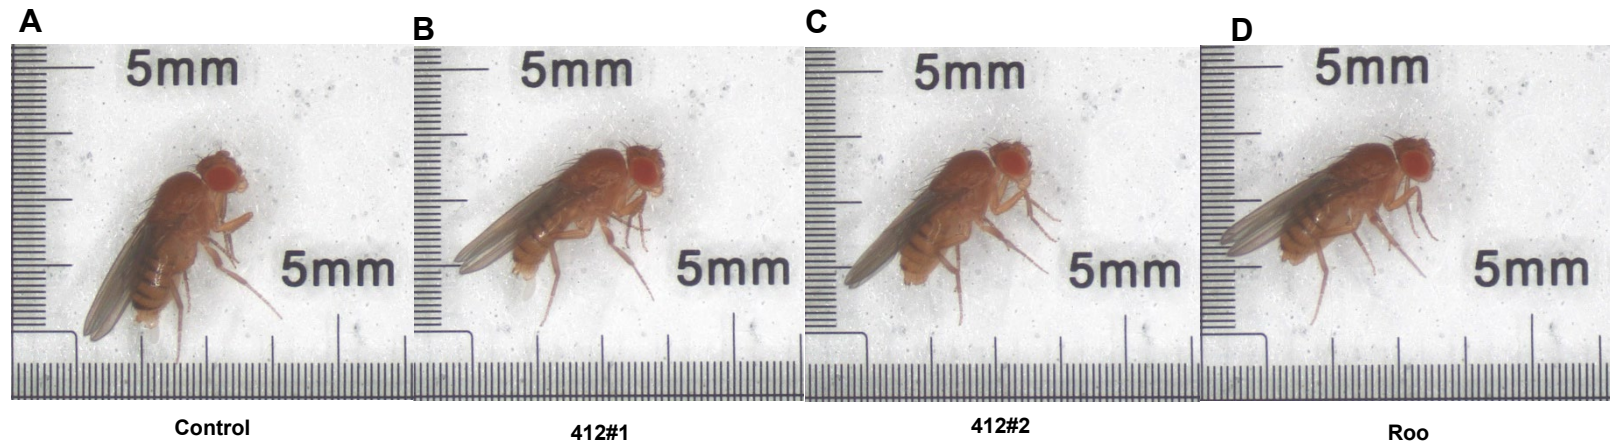

Act5c>dcas9-KRAB

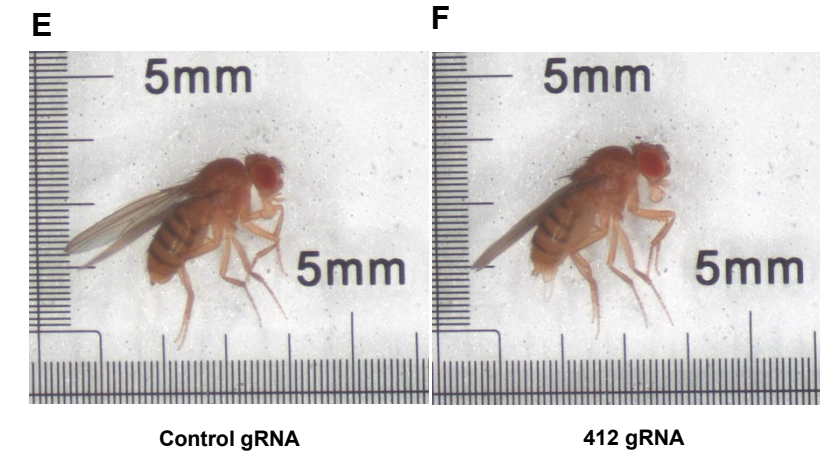

**G**

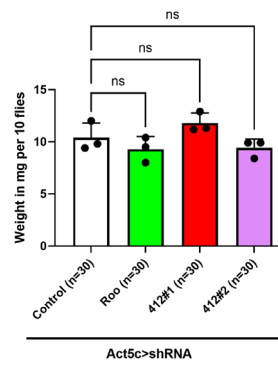

**H**

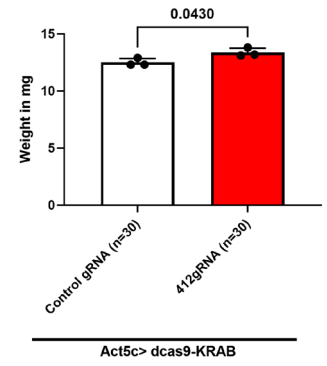

## **S1 Fig. Morphology and body weight of 412 and Roo knockdown animals**

(A) Picture of the morphology of an Act5c>control shRNA fly. (B) Picture of the morphology of an Act5c>412#1 shRNA fly. (C) Picture of the morphology of an Act5c>412#2 shRNA fly. (D) Picture of the morphology of an Act5c>Roo shRNA fly. (E) Picture of the morphology of a CRISPRi (Act5c>dcas9-KRAB) with control gRNA fly. (F) Picture of the morphology of a CRISPRi (Act5c>dcas9-KRAB) with 412gRNA fly. (G) Body weight of Act5c>shRNA flies in milligrams (mg) per 10 flies. Each dot represents a set of 10 flies. This experiment was done in triplicate. One-way ANOVA. ns (412#1)  $p=0.3535$ . ns (412#2)  $p=0.5904$ . ns (Roo)  $p=0.5250$ . (H) Body weight of Act5c>dcas9-KRAB CRISPRi flies in milligrams (mg) per 10 flies. Each dot represents a set of 10 flies. This experiment was done in triplicate. Unpaired t-test. \*  $p=0.0430$ .

## Supplemental Figure 2

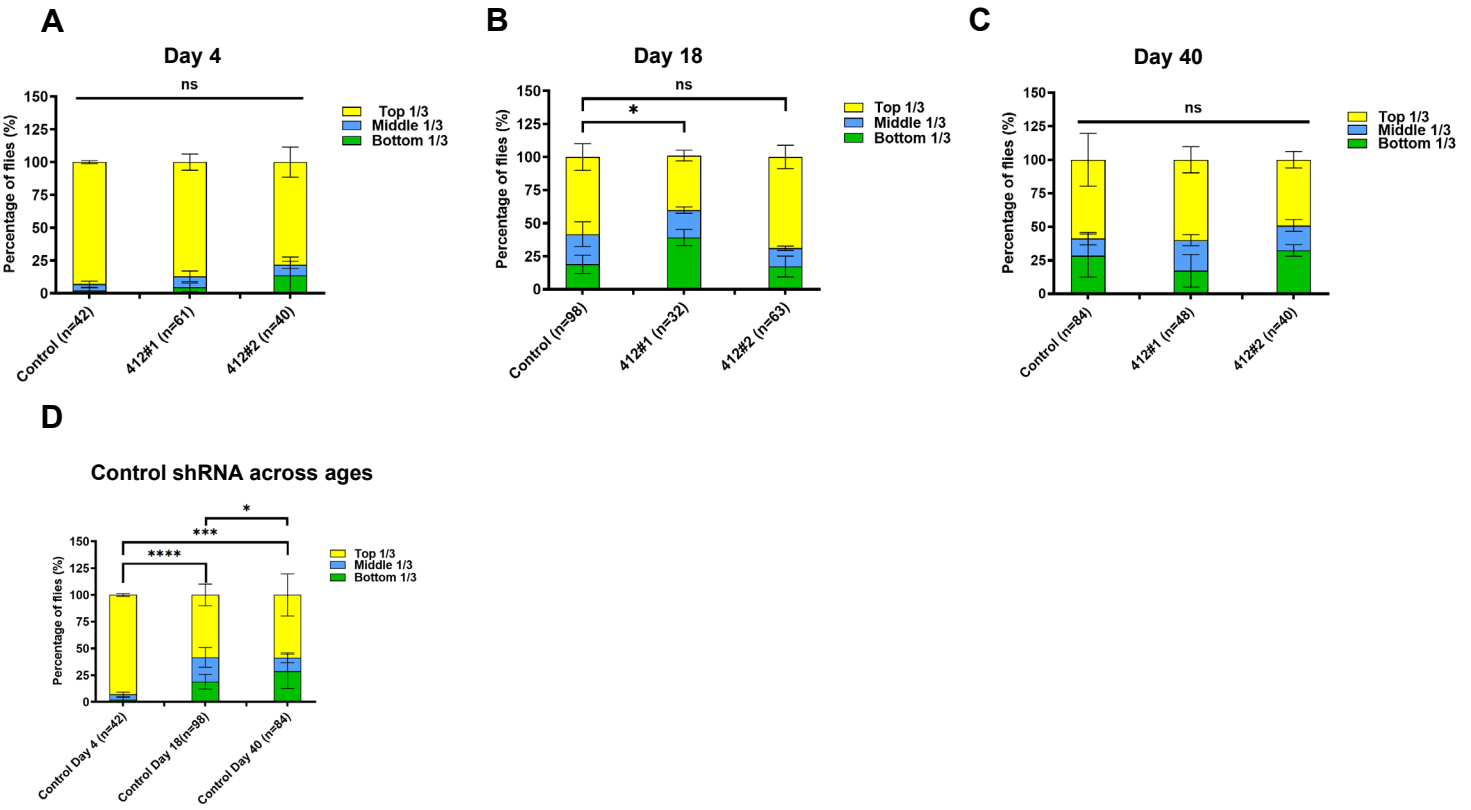

## S2 Fig. Negative geotaxis locomotion assay across age

(A) Act5c>shRNA day 4 measurement of locomotion via negative geotaxis assay. The percentages of flies in each third of the vial is displayed. Fisher's exact test. ns (412#1)  $p=0.5184$ . ns (412#2)  $p=0.1119$ . (B) Act5c>shRNA day 18 measurement of locomotion via negative geotaxis assay. The percentages of flies in each third of the vial is displayed. Chi-square test for trend. \* (412#1)  $p=0.0332$ . ns (412#2)  $p=0.4232$ . (C) Act5c>shRNA day 40 measurement of locomotion via negative geotaxis assay. The percentages of flies in each third of the vial is displayed. Chi-square test for trend. ns (412#1)  $p=0.4613$ . ns (412#2)  $p=0.3030$ . (D) Act5c>Control shRNA days 4, 20, and 40 measurement of locomotion via negative geotaxis assay. The percentages of flies in each third of the vial is displayed. Chi-square test for trend. \*\*\*\* (day 4 vs day 20)  $p<0.0001$ . \*\*\* (day 4 vs day 40)  $p=0.0001$ . \* (day 20 vs day 40)  $p=0.0493$ .
